# Supplementary material for: Cost-Effectiveness of Screening for HIV in the Era of Highly Active Antiretroviral Therapy
Source: Atypon-hosted journal article supplement (doi:10.1056/nejmsa042657), 2005-02-09
Supplement: 570sa1.pdf [file 570sa1.pdf]

## Supplementary Appendix

This appendix has been provided by the authors to give readers additional information about their work.

Supplement to: Sanders GD, Bayoumi AM, Sundaram V, et al. Cost-effectiveness of screening for HIV in the era of highly active antiretroviral therapy. *N Engl J Med* 2005;352:570-85.

## WEB ONLY APPENDIX

### 1. Model Overview

We developed a Markov state-transition model to describe the natural history of HIV disease. We assumed a societal perspective to evaluate health benefits and costs, discounting each at a 3% annual discount rate. We expressed our results in terms of costs, life-years, quality-adjusted life-years (QALYs), and incremental cost-effectiveness ratios.

The simulation tracks patients' health from the time of entry into the model until death. A patient's health is characterized by distinct health states; the natural history is summarized by the possible transitions between these states. Because each health state has a corresponding cost and quality of life, tracking the transitions between states and counting the accrued costs and quality of life effects yields estimates of the overall costs, life expectancy, and quality-adjusted survival.

The objective of this model is to evaluate the cost effectiveness of screening for HIV. To do so, the model tracks a cohort of individuals, some of whom are already infected with HIV. Those who are HIV uninfected may become HIV-infected and subsequently can be identified. HIV-infected patients can start treatment and progress to an AIDS-related death or death from other causes. The specific focus of this model is the transition from the state of being "HIV infected, unidentified" to "HIV infected, identified" through screening or case finding based on symptoms.

#### 1.1 Strategies

We evaluated two strategies: screening for HIV infection (HIV Screen) and not screening (No Screening). We further adjusted our model to examine strategies of recurrent screening (annual screening to screening every 9 years), including investigation of the optimal screening frequency from a cost-effectiveness perspective.

## 1.2 Entry into the Model

Patients in both strategies entered the Markov model (**Figure 1**) either as an uninfected patient or as a patient with unidentified HIV infection. Those with unidentified HIV infection were asymptomatic (75%), had symptoms of HIV infection without AIDS (15%), or had experienced an AIDS-defining condition (10%) (**Table 1**). Throughout the model, we defined AIDS according to clinical, rather than laboratory parameters, following the 1987 Centers for Disease surveillance case definition.<sup>1</sup>

## 2. Definition of Model States

States in the model were characterized by five components:

- (1) the health condition of the patient, which classified patients using three characteristics: a) alive or dead; b) HIV infected or not; and c) stage of HIV infection (symptomatic, asymptomatic, or clinical AIDS).
- (2) whether the infected patient's HIV status is known or unknown.
- (3) the use and type of antiretroviral therapy, which we classified according to the potential to achieve effective virologic suppression, the number of previous regimens discontinued due to inefficacy, and the number of previous regimens discontinued due to intolerance.
- (4) the viral load level, which we classified as suppressed or high.
- (5) the patient's CD4 count.

Each of these components is described in greater detail below. Although the set of possible health states from combining the components listed above is very large, we simplified the model by not including some states which are improbable (for example, it is very unlikely that an antiretroviral naïve patient would have a suppressed viral load) and by combining some states (for example, we assumed that the distinction between symptomatic and asymptomatic HIV infection was not important after antiretroviral therapy was initiated).

## 2.1 Health Conditions

We defined five health conditions for the model: uninfected, asymptomatic HIV infection without AIDS, symptomatic HIV infection without AIDS, AIDS, and death. Once a patient started HIV antiretroviral therapy, the distinction between asymptomatic and symptomatic HIV infection was no longer made. We did not distinguish between minor and severe AIDS defining illnesses, nor did we distinguish between single and multiple AIDS defining illnesses.

Individuals could transition from having clinical AIDS back to having HIV without AIDS if they experienced virologic suppression to below the limit of quantification after experiencing an AIDS defining condition.

## 2.2 Knowledge of HIV Status

We classified HIV-infected patients according to whether it was recognized that they had HIV infection or not. The recognition could occur as a result of either screening or symptom-based case finding.

## 2.3 Antiretroviral Therapy

We assumed that the patient had two consecutive phases of antiretroviral therapy, which we labelled “suppressive therapy” and “non-suppressive therapy” (**Figure 2**).

### 2.3.1 *Suppressive Therapy*

In suppressive therapy, the goal of therapy was to suppress viral load below the level of quantification of standard assays.<sup>2</sup> We assumed that identified patients started antiretroviral therapy when their CD4 count reached 350 cells/ $\mu$ L and continued treatment throughout the course of their illness. We assumed that patients used three antiretrovirals in combination during the first and second HAART regimens and four antiretrovirals in the third regimens and during non-suppressive therapy. Patients switched regimens either because of inefficacy or intolerance.

Inefficacy was defined as a rebound in viral load levels or the development of a new AIDS defining illness. We assumed that each individual would use three distinct suppressive therapy regimens before progressing to non-suppressive therapy. The probability of achieving a successful virologic response decreased after virologic failure, but not after changing antiretrovirals due to intolerance.<sup>3</sup>

### 2.3.2 *Non-Suppressive Therapy*

We assumed that, after intolerance or inefficacy with multiple antiretroviral regimens, suppression to below virologic quantification would not be possible. Patients then started non-suppressive therapy, in which the goal of treatment was to decrease – but not completely suppress – viral load. Partial virologic suppression may still be beneficial because it confers a slower rate of CD4 decline compared to patients not using antiretrovirals and therefore, may delay disease progression.<sup>4-6</sup>

## 2.4 Viral Load

We modeled viral load levels in four ways in the model: 1) before the initiation of antiretroviral therapy; 2) after successful virologic therapy; 3) during transient virologic rebound; and 4) after suppressive therapy was exhausted.

### 2.4.1 *Set Point Viral Load*

We assumed that viral load levels prior to therapy remained stable from shortly after infection until treatment was initiated; that is, viral load was maintained at a “set point”,<sup>7,8</sup> meaning it was constant at this level. Our base-case value for this level was 4.6 log<sub>10</sub> copies/mL, a typical value for antiretroviral naïve patients in observational and interventional studies.<sup>9-14</sup>

#### 2.4.2 Suppressed Viral Load

After successfully initiating antiretroviral therapy, we classified patients as having a “suppressed viral load.” We defined a “suppressed” viral load as 500 copies/mL or less. However, rather than a range of values, our model required a single quantitative level of viremia for patients with suppressed viral loads. To estimate this level, we used data from the INCAS study, in which patients with viral load levels of 500 copies/mL or less underwent further quantification with a more sensitive assay<sup>15</sup>. In that study, the median level was at the limit of quantification for the more sensitive assay, which was 20 copies/mL ( $1.3 \log_{10}$ ). Accordingly, we assumed that patients with suppressed viral loads would have a plasma viral load level of 20 copies/mL and examined lower and higher values (1 to 500 copies/mL) in sensitivity analyses.

Although we assumed that the goal of antiretroviral therapy was to decrease viral load levels to below the limit of quantification, which is 20 to 50 copies/mL with current assays, we included patients with viral load levels less than 500 copies/mL in the “suppressed viral load” state”, for three reasons. First, many early HAART studies were conducted when the limit of detection was 400 to 500 copies/mL. Thus, more accurate natural history data relating to this threshold is available on which to base our model. Second, our model incorporated the use of resistance assays, which cannot be used if the viral load level is too low. Third, the clinical management of individuals with viral load levels between 20 and 500 copies/mL is uncertain and some clinicians may elect not to change antiretroviral therapy at these levels.<sup>16</sup> Although such patients are at higher risk for acquiring HIV-resistant viruses than patients with levels below the limit of quantification, the risk of disease progression is low and therapeutic options may be too rapidly expended if treatment changes are initiated at these low levels.<sup>15</sup>

#### 2.4.3 Virologic Rebound

After suppressive therapy fails, we assumed that the viral load level would rebound towards baseline values. Two studies (in which the set point values were 4.5 and 4.6 log<sub>10</sub> copies/mL, compared to our value of 4.6) suggest that rebound viral load levels are less than the original levels by 0.2 to 1.2 log<sub>10</sub> copies/mL.<sup>13, 14</sup> In our base case, we assumed that the rebound viral load was 4.1 log<sub>10</sub> copies/mL, 0.5 log<sub>10</sub> copies/mL less than baseline.

#### 2.4.4 Viral Load During Non-Suppressive Therapy

We assumed that viral load would increase once suppressive therapy was exhausted and increase even further after developing AIDS.<sup>2, 17, 18</sup> Observational studies have suggested that among patients with detectable viral load levels, levels rose by about 0.05 to 0.16 copies/mL/year.<sup>8, 19-21</sup> To simplify the model, we assumed that this increase happened upon initiating non-suppressive therapy and estimated the total rise to be 0.8 log<sub>10</sub> copies/mL (range for sensitivity analysis 0 to 1.5) above the original set-point value.<sup>21</sup> We estimated a further 1 log<sub>10</sub> increase with the development of AIDS (range 0 to 2.0).<sup>19, 22, 23</sup> Our model used the viral load to predict the rate of disease progression; however, the predictions may be inaccurate if the model patient's viral load levels are not in the range of the initial data. To avoid this possibility, we set a maximum viral load level of 6.0 log<sub>10</sub> copies/mL, based on the observation that by the time viral load levels have reached this level, virtually all patients have died.<sup>24</sup>

We assumed that non-suppressive therapy could decrease viral load levels somewhat and that there were beneficial effects from this decrease, even in the absence of complete suppression.<sup>4, 5</sup> We estimated the magnitude from the pooled average decrease observed with sub-optimal regimens including dual antiretroviral therapy and sequential addition of protease inhibitors in several trials.<sup>15, 25-28</sup> Our base-case estimate was a drop of 0.9 log<sub>10</sub> copies/mL and our sensitivity analysis ranges were set at 0 (indicating no effect of anti-suppressive regimens) and 2 log<sub>10</sub>

copies/mL. The GART study estimated that viral load dropped by 0.37  $\log_{10}$  copies/mL for every active drug (a drug for which the patient does not have a resistant virus) and 0.17 for every inactive drug.<sup>4</sup> Thus, a drop of 0.9  $\log_{10}$  copies/mL is reasonable, reflecting the scenario in which a patient takes a non-suppressive regimen consisting of 1 active and 3 inactive drugs. Because many new antiretroviral medications and drug classes are in development, we assumed that patients would use multiple non-suppressive regimens over time.<sup>29</sup> Thus, we assumed that the drop in viral load levels with non-suppressive therapy was sustained.

## 2.5 CD4 counts

We modeled CD4 counts in three ways in the model: 1) before the initiation of antiretroviral therapy; 2) after successful virologic therapy; and 3) after suppressive therapy was exhausted. Health states were defined according to the patient's CD4 count, which we classified into 17 strata in intervals of 50 cells/ $\mu$ L ranging from 0-49 cells/ $\mu$ L to 850-900 cells/ $\mu$ L. We assumed that patients within a given stratum had a similar prognosis whether they transitioned into the state from a stratum with a greater CD4 count (such as with a falling CD4 count with ineffective therapy) or from one with a lower CD4 count (such as after immune reconstitution). This assumption is consistent with several natural history studies of patients receiving HAART.<sup>30-34</sup>

## 3. Transitions Between States

Each month, some patients remained in their current state, others experienced changes in health related to HIV infection, and some died of causes unrelated to HIV, at the rate of a similar age-matched U.S. cohort. We modeled transitions between health states (from HIV uninfected to asymptomatic HIV infection; from asymptomatic to symptomatic HIV infection; from symptomatic HIV infection to experiencing an AIDS complication; and from AIDS to HIV-related death (**Figure 1**)), transitions related to identifying HIV infection, transitions between

antiretroviral therapy states, transitions between viral load level states, and transitions between CD4 states.

### 3.1 Transitions Between Health Conditions

#### 3.1.1 Transition from Uninfected to HIV Infected

Each month uninfected patients were at risk of becoming infected with HIV. Annual age- and gender-specific incidence of HIV was based on work done by Rosenberg (**Figure 3**).<sup>35</sup> Because these incidences reflected general population incidences, we evaluated the cost-effectiveness of HIV screening in populations with 2- and 3-times the incidence in sensitivity analyses.

#### 3.1.2 Transition Between HIV and AIDS

We estimated the transition of progressing from HIV infection without AIDS to AIDS as rates, in which the numerator is the number of events experienced by a population and the denominator is a product of the number of people in the population and the length of time during which they were observed. We assumed that the rate was constant over time; that is, that the probability could be defined by an exponential distribution. Accordingly, the probability of transitioning from one state to the next in a time interval  $t$ , given an annual rate of  $\mu$ , can be derived by the formula<sup>36</sup>:

$$\text{probability} = 1 - \exp(-\mu \times t)$$

To estimate the probability at any given time in the model, we followed two steps. First, we estimated the baseline hazard rate for fixed CD4 and viral load values. Second, we modified the hazard rate to reflect changes in CD4 and viral load levels over time as a result of both the natural history of HIV and antiretroviral therapy. That is, the rate of disease progression varied across CD4 counts and viral load levels. Accordingly, we adjusted the baseline rate by determining the relative hazard of developing AIDS at different levels of these laboratory tests.

Several studies have indicated that incorporating data from these two parameters accounts for the large majority of the treatment effect of antiretrovirals.<sup>37-42</sup> In all cases, we modeled the risk as changing with continuous levels of the parameters, which provides better model fits than using discrete levels.<sup>2</sup> In deriving these parameters, we gave greatest weight to analyses that modeled viral load as a time-dependent variable (rather than relying solely on baseline values), used multivariable models that combined viral load and CD4 count data, and separated the endpoints of AIDS and death.<sup>22, 43-45</sup> Studies that met only some of these criteria were examined for consistency with the base case estimates and to set limits for the ranges for sensitivity analyses.

#### 3.1.2.1 Baseline Hazard Rate: HIV to AIDS

We based our estimate of the rate of transition from HIV to AIDS on published data from the Multicentre AIDS Cohort Study.<sup>46</sup> In this large observational study, 258 patients had a CD4 count between 351 and 750 cells/ $\mu$ L at baseline with a viral load between 10,001 and 30,000 copies/mL with the bDNA assay, corresponding to 20,442 to 54,894 copies/mL (4.3 to 4.7 log<sub>10</sub> copies/mL) with the RT-PCR assay. We assumed that our base case would have a similar risk of progression. At three years, 16.1% of patients had developed AIDS (95% confidence interval [CI] 12 to 21%). Assuming an exponential distribution of transition probabilities and calculating to one significant digit, the transition rate was 6 events per 100 patient years (95% CI 4 to 8). Similar transition rates were observed from smaller studies, albeit with wider confidence intervals.<sup>47, 48</sup> Because these estimates included only baseline values, and did not account for the possibility of declining CD4 counts over time, they may have overestimated the true transition rate. Accordingly, we set the lower bound for the range for sensitivity analysis below that of the lower bound of the 95% confidence interval. Thus, the final range for sensitivity analysis was 2 to 12 new AIDS diagnoses per 100 patient years. We incorporated a small risk of developing

new AIDS illnesses when the viral load was suppressed to account for AIDS-defining conditions, like lymphoma, whose incidence is not related to CD4 counts.

### 3.1.2.2 Relative Hazard: HIV to AIDS per change in Viral Load Levels

We first estimated how the rates of disease progression would change with changes in viral load levels. Two high-quality studies estimated the time-dependent relative hazard of developing AIDS.<sup>22, 43</sup> Combining these study results (using random-effects meta-analysis methods) yielded an estimate of the relative hazard of 0.43 per 1 log<sub>10</sub> drop in plasma viral load, with 95% confidence intervals of 0.28 to 0.65. These values are close to an overview of studies that used a combined endpoint of AIDS or death (0.49, 95% CI 0.23 to 0.76).<sup>44</sup> Similar values have been reported in studies which assessed baseline viral load at only one or two points in time or used combined endpoints.<sup>8, 24, 37-39, 41, 42, 45, 47-55</sup>

### 3.1.2.3 Relative Hazard: HIV to AIDS per change in CD4 Count

We used a similar process for estimating the relative hazard of AIDS relative to CD4 count changes. One study examined the relative hazard of developing AIDS related to time-dependent changes in absolute CD4 counts and adjusted for viral load levels; the estimate of the relative hazard for every 1 log<sub>10</sub> change in the CD4 count was 0.0154 (95% CI 0.0013 to 0.36).<sup>43</sup> However, the range of relative hazards reported in the literature relating to CD4 counts is wider than that for viral load levels; in addition, studies differ as to whether they report absolute or relative changes in CD4 counts. For the latter studies, we estimated the rate per 1 log<sub>10</sub> change by applying the relative change to the mean or median baseline count, where available. To reflect these uncertainties, we used a wide range in sensitivity analysis from a low of 0.0002 to a high of 1.00 (indicating that CD4 changes did not influence the relative hazard of disease progression).<sup>8,</sup>

<sup>22, 24, 37-45, 47-56</sup>

### 3.1.3 Transition To Death

We assumed that all HIV-related deaths occurred among individuals with AIDS. We used a similar method to estimate the risk of death from AIDS as we did to estimate the risk of transitioning from HIV to AIDS.

#### 3.1.3.1 Non-AIDS Related Death

At all times in the model, patients could die from non-AIDS related causes. Age and sex specific mortality rates for such deaths were calculated from statistical life tables.<sup>57</sup>

#### 3.1.3.2 Baseline Hazard Rate: AIDS to AIDS-related Death

We based these estimates on a cohort study of injection drug users based in Baltimore, MD.<sup>47</sup> In this study, patients with a CD4 count between 200 and 499 cells/ $\mu$ L and a viral load (using the bDNA assay) between 10,000 and 29,999 copies/mL had a 15.6% chance of dying from an infectious disease within 5 years, corresponding to a rate of 3 deaths per 100 patient-years under the assumption of an exponential probability distribution. Assuming no loss to follow-up, the calculated exact binomial confidence interval was 2 to 7 deaths per 100 patient-years. We widened this range for the sensitivity analysis because some infectious disease deaths were not due to AIDS, some patients were likely lost to follow-up, and CD4 counts and viral load levels likely changed over time. Accordingly, the range for sensitivity analysis was 1 to 10 deaths per 100-patient years. We did not model rare deaths from HIV-related causes not due to an AIDS-defining condition.

#### 3.1.3.3 Relative Hazard: AIDS to AIDS-Related Death per change in Viral Load Levels

We next estimated the relative hazard of dying from AIDS with changes in viral load levels. We based our estimate primarily on one study that adjusted for CD4 counts and analyzed viral load as a time-dependent covariate.<sup>45</sup> The relative hazard of dying from this study was 0.64 per 1

$\log_{10}$  decrease in plasma viral load with 95% confidence intervals 0.55 to 0.75. Similar values were observed in trials that assessed viral load at only one or two points in time or did not fully control for CD4 counts<sup>8, 24, 38, 47, 49, 50, 55</sup>

#### 3.1.3.4 Relative Hazard: AIDS to AIDS-Related Death per change in CD4 Counts

We based our estimate of the relative hazard for death on a study that examined CD4 counts as a time-dependent covariate and controlled for viral load count; the relative hazard was estimated at 0.118 (95% CI 0.064 to 0.329) per 1  $\log_{10}$  change in the CD4 count as calculated in Section 3.1.2.3. Studies estimating the relative hazard from only one or two points in time have yielded similar values<sup>24, 47, 49, 50, 55</sup>

### 3.2 Transition from Unknown to Known HIV Infection

Patients could transition from having unknown HIV infection to known infection in one of two ways. They could be tested for HIV infection through an HIV screening program when asymptomatic or they could be identified as having HIV when they presented with HIV-related symptoms (case finding).

We assumed that the annual probability of patients being identified through symptom-based case finding was 0% at a CD4 count of 350 cells/ $\mu$ L or more, 80% at a CD4 count of 50 cells/ $\mu$ L or less, and ranged between 0% and 80% at CD4 counts between 50 and 350 cells/ $\mu$ L. We used linear interpolation to estimate symptom-based case finding rates within this range. **Figure 4** demonstrates the relationship between current CD4 count and annual probability of symptom-based case finding in our analysis. Together, these assumptions determined that infected HIV patients in the “No Screening” strategy were identified through symptom-based case finding at an average CD4 count of 175 cells/ $\mu$ L. In sensitivity analysis, we varied both the maximum case finding rate and the threshold at which the maximum rate was reached.

### 3.3 Transition Between Antiretroviral Regimens

Regimens were changed due to inefficacy or intolerance. Regarding efficacy, we modeled two aspects related to viral load kinetics. First, we estimated the probability of attaining virologic suppression after starting antiretrovirals. Second, we estimated the time to virologic rebound for those patients achieving initial virologic control. We also modeled the concurrent effects on CD4 counts with virologic control (See Section 0 3.5.2 CD4 Counts During Suppressive Therapy).

#### 3.3.1 Initial Virologic Suppression

We based our estimates of the probability of achieving initial virologic suppression on both randomized controlled trials and observational studies. However, the estimates from clinical trials may be too high if trials analyze their results focusing only on those patients without missing data and having complete follow-up.<sup>10</sup> Conversely, using an intent-to-treat analysis and assuming that all missing patients experienced virologic failures may under-estimate the efficacy of antiretrovirals. Observational studies, which have generally reported lower success rates than clinical trials, may under-estimate the efficacy of antiretroviral use if they include a large number of heavily pre-treated patients, include less potent protease inhibitors (such as saquinavir hard-gel capsules), or combine protease inhibitors or non-nucleoside reverse transcriptase inhibitors sub-optimally (or not at all) with other antiretrovirals. Thus, we placed greatest weight on trials that evaluated the proportion of patients achieving a viral load of 500 copies/mL or less with complete follow-up and optimal use of antiretrovirals, in accord with the latest published guidelines.<sup>58, 59</sup>

In the AVANTI trials, the proportion of patients failing to achieve a viral load level of 400 copies/mL or less was variably estimated between 16% and 33%, depending on the type of analysis and the inclusion or exclusion of missing data.<sup>10</sup> An overview of several HAART regimens in predominantly antiretroviral naïve patients estimated that the proportion failing to

achieve a viral load level of 400 copies/mL or less, using a per-protocol analysis and excluding missing data, was 19% (95% CI 5 to 43%).<sup>10</sup> Other trials using a plasma viral load threshold of 400 or 500 copies/mL have yielded estimates commensurate with this overview. While clinical trials have reported probabilities of failure between 2 and 50%, observational trials have reported probabilities between 5 and 60%.<sup>11, 12, 14, 15, 27, 28, 60-88</sup>

In the base case, we assumed that 20% of patients who were tolerant of HAART would fail to suppress viral load levels to 500 copies/mL or less after their initial antiretroviral regimen. To reflect the considerable uncertainty in this estimate, we set the sensitivity analysis ranges to be wide (2% to 70%).

Antiretroviral-experienced patients initiating HAART have failure rates of about 20 to 40%.<sup>63, 75, 76, 78, 81, 89-91</sup> Multivariate models suggest that the relative risk is 2 to 3 times higher for experienced, compared to naïve, patients.<sup>67, 70</sup> Accordingly, we evaluated the scenario in which an antiretroviral-experienced patient was initiating HAART and estimated the probability of failing a first HAART regimen as being 2.5 fold higher than that for an antiretroviral naïve patient with each antiretroviral regimen, modeled as an odds ratio.

Data suggest that patients failing second or third HAART regimens may have higher failure rates. Observational studies indicate that protease inhibitor-experienced patients starting another protease inhibitor based regimen have a probability of failure of 30 to 80%.<sup>6, 12, 14, 65, 76, 80, 81, 83, 86, 92-96</sup> Patients with two HAART regimen failures likely have the greatest risk of failing further HAART regimens. Randomized controlled trials of genotypic or phenotypic resistance testing indicate that 67% to 75% of patients failing their first or second HAART regimen who do not receive a resistance test experience virologic failure, although this number was significantly lower in patients receiving a resistance test.<sup>4, 97, 98</sup> Accordingly, we estimated that the probability

of virologic failure (plasma viral load of 500 copies/mL or higher) with a second HAART regimen was 35% (range 20 to 80%) and with a third regimen was 70% (range 60 to 95%).

### 3.3.2 Duration of Viral Load Suppression

We used interventional and observational data to estimate the short-term rate of virologic rebound. Two trials of maintenance antiretroviral therapy were specifically designed to evaluate the rate of virologic rebound; these studies indicated that about 4 to 6% of patients using indinavir-based triple therapy have virologic rebound at 3 to 6 months.<sup>99, 100</sup> The study with longest follow-up is from a small trial of indinavir, zidovudine, and lamivudine combination therapy in antiretroviral-experienced patients.<sup>28, 101</sup> Approximately 90% of patients achieved initial virologic success ( $\leq 500$  copies/mL). Of 31 patients from the initial cohort available for evaluation three years after initiating therapy, 68% were still below this threshold; thus, we calculated that 24%  $((90-68)\div 90)$  of patients achieving initial virologic suppression had rebounded by 3 years. The study with the largest sample size was reported by the Swiss Cohort Study, in which 20% of treatment naïve patients achieving virologic control had virologic rebound at 2 years. The AVANTI investigators, treating missing patients as treatment failures, found that 15% of patients with nadir viral load levels  $\leq 50$  copies/mL had virologic rebound to  $>5000$  copies/mL at one year, compared to 57% of patients with nadir plasma viral load levels between 50 and 400 copies/mL.<sup>10</sup> Other studies have estimated rebound rates consistent with these values.<sup>11, 15, 64, 77, 80, 81, 83, 86, 102-107</sup> Our base-case value of the rate of virologic failure was based on estimates between those observed in interventional and observational trials; we assumed that 15% of patients would experience failure at 2 years and varied this rate in the sensitivity analysis between 6 and 30%. Assuming a constant transition rate, these probabilities correspond to rates of 8 rebounds per 100 patient-years (range 3 to 18).

Second and third HAART regimens may be less durable than initial regimens.<sup>63, 83</sup> We modeled this decreased efficacy by assuming a proportionally increased hazard for virologic rebound with each regimen. A study of maintenance HAART therapy found that less potent regimens (indinavir monotherapy) had a relative hazard for failure of 5.8 compared to a triple drug regimen (95% CI 2.0 to 16.8).<sup>100</sup> An observational study found that antiretroviral-experienced patients were about twice as likely to experience virologic rebound as antiretroviral naïve patients.<sup>91</sup> In the base case, we assumed that each new regimen was associated with a 2-fold increase in the hazard of virologic rebound. In sensitivity analyses, we included the assumption that subsequent regimens were equally durable; thus the range for sensitivity analysis for the relative hazard for virologic rebound was 1.0 to 6.0.

### 3.3.3 Tolerability of HAART

Many patients discontinue HAART due to side effects, despite good virologic responses.<sup>71, 86</sup> The tolerability of HAART was defined in our model as the proportion that had to discontinue medication due to toxicity (other quality of life effects were modeled with quality of life weights, see below). To estimate the proportion of patients discontinuing their initial HAART regimen, we used both interventional and observational data. We gave less weight to studies that included saquinavir hard-gel capsule or ritonavir in a HAART regimen because of decreased potency and increased toxicity, respectively.<sup>26, 60, 61, 67, 69, 71, 75</sup> Interventional trials, with variable follow-up, indicate that 6 to 38% of patients discontinue therapy due to toxicity.<sup>10, 75, 92, 101, 103</sup> Large observational studies have reported rates of discontinuation of 6 to 35%.<sup>61, 67, 69, 82, 85, 105</sup> Data indicate that patients continue to stop therapy due to toxicity up to 1.5 years after initiating treatment.<sup>85, 105</sup> Indinavir and nelfinavir each had a probability of discontinuation of about 21% in a study with median follow-up of about 15 months.<sup>60</sup> The largest study with the longest follow-up estimated that the cumulative probability of discontinuation at 72 weeks was 26%,

although some patients still stopped thereafter.<sup>105</sup> Longer-term side effects are also likely to occur, although we did not account for these.<sup>108, 109</sup> We estimated that 25% of patients would stop their first HAART regimen, that all would do so within the first two years of initiating therapy, and that the rate of discontinuation was constant over this time. In sensitivity analysis, we varied the proportion discontinuing therapy (from 5 to 40%) and the time over which toxicity developed (from 1 to 4 years).

We assumed that second HAART regimens were associated with equivalent toxicity to initial regimens, but tested this assumption in sensitivity analyses. However, we assumed that 3<sup>rd</sup> regimens contained both a greater number of drugs and medications with higher toxicities, yielding higher rates of discontinuation. Studies have reported discontinuation rates for ritonavir-based regimens of 21 to 54%.<sup>26, 60, 61, 67, 69, 71, 75</sup> Patients initiating ritonavir-based HAART regimens have approximately 2.2 times the relative hazard of discontinuing treatment.<sup>105</sup> Dual protease inhibitor-based HAART has a similar probability of discontinuation.<sup>63, 80, 110</sup> Thus, we estimated that the discontinuation rate for the third HAART regimen was 1.4-fold higher than that for the initial regimen (sensitivity analysis range 1.0 to 4.0).

### 3.4 Transition Between Viral Load Levels

#### 3.4.1 *Virologic Suppression*

In patients who respond to antiretroviral therapy, viral load levels generally start to decline by as early as two weeks.<sup>10</sup> We assumed that patients who had not responded by one month would change antiretroviral regimens. The median time to reach this nadir level varied across studies from 2 to 12 weeks, with a maximum time of 7 to 10 months.<sup>10, 12, 15, 63, 64, 96</sup> We assumed that for patients with successful virologic suppression, the viral load level would drop in a log-linear fashion over 3 months (range 1 to 10 months) until the nadir was reached.

### 3.4.2 Virologic Rebound

We assumed that patients with virologic suppression had a risk of virologic rebound at every month. We assumed that patients identified as having virologic rebound started a new antiretroviral regimen, we did not model drug holidays or structured interruptions. In some instances, however, there was a lag between when virologic rebound occurred (which could happen at any time) and when it was detected (which occurred at regular intervals when viral load testing was performed). Viral load testing was performed at a frequency of every 3 months, with two exceptions.<sup>2, 16, 111</sup> First, the patients had an additional viral load test 1 month after initiating or changing therapy to assess their responses. Second, a viral load test indicating virologic rebound was confirmed with a repeat test.

## 3.5 Transition Between CD4 count Levels

### 3.5.1 CD4 Counts Prior to Initiation of Therapy

We assumed that CD4 counts declined prior to the initiation of therapy. Empirical evidence suggests that the rate of decline is related to the viral load level.<sup>46</sup> Cook and colleagues have estimated the decline in CD4 cell count (cells/ $\mu$ L/year) to be:<sup>112</sup>

$$\Delta CD_4 = -79.2 + 33.5 \times \log_{10} \text{viral load}$$

We used this model to estimate the change in CD4 counts over time, incorporating the assumption that CD4 counts never increased without therapy (hence, CD4 values were stable if plasma viral load was  $\leq 2.36 \log_{10}$  copies/mL).

### 3.5.2 CD4 Counts During Suppressive Therapy

We assumed that CD4 counts remained stable while receiving suppressive therapy because, even if virologic rebound occurred, antiretroviral therapy was changed before CD4 counts fell. We estimated that CD4 cell counts increased after successful initiation of therapy. Studies

suggest that it is rare for CD4 counts to remain stable with large drops in viral load.<sup>113</sup> It is also uncommon for patients to have an improvement in CD4 counts without a large change in viral load levels.<sup>6, 113, 114</sup> Thus, we made the simplifying assumption that CD4 counts did not change if virologic suppression was not achieved, that is, we only modeled concordant CD4 and viral load responses.

Several studies have indicated that, after significant drops in viral load levels, the rise in CD4 is strongly related to the baseline CD4 level but only weakly to the initial viral load level.<sup>88, 115, 116</sup> Drusano and colleagues found an excellent fit between the increase in CD4 count and the baseline CD4 count; the viral load level improved the model slightly.<sup>115</sup> In our model, we used a simplification of the Drusano equation:

$$\Delta CD_4 \text{ when starting therapy} = 110 + 535 \times \left( \frac{\text{initial } CD_4^{0.98}}{\text{initial } CD_4^{0.98} + 260} \right)$$

and modified it further to assume that the minimal rise in CD4 counts was 60 cells/ $\mu$ L. This estimate yielded increases consistent with those seen in clinical trials.<sup>68, 73</sup>

We assumed the CD4 count increased rapidly in the first 2 months, more slowly thereafter until the maximum level was reached, and then stabilized while viral load levels were suppressed. CD4 counts declined again when virologic rebound occurred. The rates of increase and decline were estimated from previous regression models and observational data (**Table 1**).<sup>46,</sup>

68, 73, 88, 112, 115, 116

### 3.5.3 CD4 Counts During Non-Suppressive Therapy

During non-suppressive therapy, we assumed that CD4 again fell according to the Cook formula described above. In this part of the model, we tracked the CD4 count continuously from the time non-suppressive therapy was initiated until it reached a nadir value, which we set at 20 cells/ $\mu$ L, in order to avoid over-estimating the risk of death and AIDS.

#### 4. Quality of Life

When unidentified as being HIV infected, we assumed individuals had reduced quality of life, with a quality-of-life weight of 0.91, consistent with data we have collected.<sup>117</sup> Once identified, we assumed that quality-of-life weight decreased initially to 0.84 for the first year after identification and then increased to 0.89 until symptoms of HIV developed, as was the case in formal quality of life assessments we performed in 66 patients.<sup>117</sup> Patients with symptomatic and untreated HIV infection had a quality of life weight of 0.79. Once HAART was initiated, this weight increased to 0.83. With the occurrence of AIDS, we assumed quality of life declined, with a weight of 0.73 (**Table 1**).<sup>118-121</sup> We varied these assumptions extensively in sensitivity analyses.

To model the quality of life associated with dose-limiting side effects, we assumed that there was a transient decrease in quality of life, which lasted for one month. The value for this was assumed to be equivalent to that of side effects related to *Mycobacterium avium* prophylaxis, 0.53.<sup>122</sup>

These studies used time trade-off<sup>117, 118</sup> and standard gamble<sup>119, 120</sup> methods to elicit HIV infected patients' estimates of utility for the following health states: asymptomatic HIV infection, symptomatic HIV infection, and AIDS.

#### 5. Costs of Care

The annual cost of care for HIV infected patients with CD4 counts greater than 500, 200-500, and less than 200 cells/ $\mu$ L was \$2,978, \$5,096, and \$7,596, respectively (\$2004) (**Table 1**). The annual cost of care of a patient with AIDS was \$10,998. Patients using non-suppressive therapy cost \$16,230 annually.<sup>16, 59, 98, 123-125</sup> Patients who experienced a dose-limiting side effect were given a one-time cost of \$148 representing the cost of a typical out-patient visit.<sup>126-128</sup>

We updated all costs to 2004 U.S. dollars using the gross domestic product (GDP) deflator.<sup>129, 130</sup> Unlike the medical component of the Consumer Price Index (CPI), the GDP deflator accounts for improvements in productivity. In addition, the GDP deflator considers all domestic economic activity, while the CPI only includes spending by households.

## **6. Transmission of HIV to Sexual Partners**

Transmission from an HIV infected patient to their sexual partner(s) depended on the infected patient's sex, type of sexual activity, number of sexual partners, knowledge of HIV status, and viral load.

We assumed that, on average, heterosexual men and women each had one sexual partner at risk of acquiring HIV over the course of a lifetime, while men-who-have-sex-with-men had two. At baseline viral load levels, and without antiretroviral therapy, we assumed that the annual rate of transmitting HIV for heterosexual men, heterosexual women, and men-who-have-sex-with-men were 3%,<sup>131-135</sup> 1%,<sup>131-134</sup> and 4%<sup>136-140</sup> respectively.

Based on randomized-controlled trials of counseling to prevent transmission of HIV by increasing condom use,<sup>141-143</sup> we assumed a 20% reduction in transmission for patients with identified HIV infection (range 0-60%). Based on studies of transmission and treatment,<sup>144</sup> we assumed that reductions in viral load further reduced transmission. Based on the work by Quinn and colleagues, we assumed that infectivity fell by a factor of 2.45 for each 1 log<sub>10</sub> copies/mL decrease in viral load.

Therefore the infected patient's sex, type of sexual activity, number of sexual partners, knowledge of HIV status, and viral load combined to give the probability of transmission each cycle using the following equation:

Probability of Transmission =

$$(\text{Number of Sexual Partners}) * (\text{Relative Risk of Infectivity})^{(\text{viral load} - (\text{starting viral load}))} * (\text{Transmission Rate}) * (1 - \text{Effectiveness of Counseling})$$

To calculate the costs and loss of life to the infected partner, we assumed that partners infected by an index patient with identified HIV infection would be identified at an earlier time than those infected by an undiagnosed patient. Infected partners of an identified HIV patient would begin HAART treatment when their CD4 count reached 350 cells/ $\mu$ L and thereby gain the life expectancy benefit from early identification and treatment. The partner's loss of life was calculated to be their age-specific life expectancy minus the life expectancy if they became infected with HIV and received treatment at 350 cells/ $\mu$ L. This latter age-specific life expectancy was calculated by our model. This loss in life expectancy would thus reduce the overall life expectancy of the index patient. Similarly, partners who were infected by an undiagnosed HIV patient would begin treatment only when identified through symptom-based case finding and therefore their loss of life would be their age-specific life expectancy minus the life expectancy if they became infected with HIV and did not receive treatment until identified through symptom-based case finding (on average at a CD4 count of 175 cell/ $\mu$ L). Again, the loss of life expectancy attributed to the HIV-infected partner would be taken into account in the index patient's life expectancy.

## **7. Transmission of HIV by Injection Drug Users**

In a sensitivity analysis we incorporated the costs and benefits of transmission of HIV by injection drug users. We made the following assumptions in this analysis: we assumed that 2.5% of the population are injection drug users, and that the prevalence of HIV in this population is 10%.<sup>145</sup> Therefore 0.25% of the HIV prevalence was accounted for by injection drug users (2.5% x 10% = 0.25%). Thus, in our base-case analysis with a prevalence of 1%, 25% of these HIV

infected patients would be injection drug users. We assumed that the injection drug users have 40 risky injections per year,<sup>145</sup> and that the risk of infection per risky injection is 0.5%.<sup>145</sup> We varied this infectivity based on viral load: a 1 log<sub>10</sub> decrease in viral load results in a factor of 2 change in infectivity.<sup>146</sup>

Because 10% of the injection drug user population is assumed to already be infected with HIV, these users can not be re-infected. Therefore, we assumed that an HIV infected patient has 36 injections with uninfected partners per year (40 risky injections – [10% of 40 = 4 to account for the partners already infected with HIV]). The risk of transmitting HIV to a partner through injection drug use is 16.5% ( $=1-(1-\text{risk of infection})^{\text{number of partners at risk}} = 1-(0.995)^{36}$ ). In our analysis we assume that if a patient's HIV status is identified then they will receive counseling regarding the risks of injection drug use and that such counseling reduces risky injections by 25%.<sup>147</sup> Therefore, patients with identified HIV have 27 injections with uninfected partners per year (40 risky injections reduced by 25% = 30 – [10% of 30 to account for the partners already infected with HIV]). For these identified patients therefore, the risk of transmitting HIV to a partner through injection drug use was 12.6% ( $=1-(0.995)^{27}$ ).

Each year we therefore assumed that HIV-infected patients who were injection drug users and were undiagnosed would transmit HIV to 16.5% of their partners. Similarly, each year we assumed that HIV-infected patients who were injection drug users and had been identified with HIV would transmit their infection to 12.6% of their partners. We assumed partners infected through injection drug use would be identified through symptom-based case finding.

We did not analyze the effects of maternal-to-fetal transmission.

## REFERENCES

1. Revision of the CDC surveillance case definition for acquired immunodeficiency syndrome. Council of State and Territorial Epidemiologists; AIDS Program, Center for Infectious Diseases. *MMWR* 1987;36 Suppl 1:1S-15S.
2. Report of the NIH Panel to Define Principles of Therapy of HIV Infection. *MMWR* 1998;47:1-41.
3. Casado JL, Perez-Elias MJ, Antela A, et al. Risk factors for ritonavir intolerance and outcome after change to indinavir [letter]. *AIDS* 1998;12(3):335-6.
4. Baxter JD, Mayers DL, Wentworth DN, et al. A randomized study of antiretroviral management based on plasma genotypic antiretroviral resistance testing in patients failing therapy. CPCRA 046 Study Team for the Terry Bein Community Programs for Clinical Research on AIDS. *AIDS* 2000;14(9):F83-93.
5. Holodniy M. What is antiretroviral failure? *Clin Infect Dis* 1999;29(1):82-4.
6. Kaufmann D, Pantaleo G, Sudre P, Telenti A. CD4-cell count in HIV-1-infected individuals remaining viraemic with highly active antiretroviral therapy (HAART). Swiss HIV Cohort Study [letter]. *Lancet* 1998;351(9104):723-4.
7. Jurriaans S, Van Gemen B, Weverling GJ, et al. The natural history of HIV-1 infection: virus load and virus phenotype independent determinants of clinical course? *Virology* 1994;204(1):223-33.
8. O'Brien TR, Rosenberg PS, Yellin F, Goedert JJ. Longitudinal HIV-1 RNA levels in a cohort of homosexual men. *J Acquir Immune Defic Syndr Hum Retrovirol* 1998;18(2):155-61.

9. Bindman AB, Osmond D, Hecht FM, et al. Multistate evaluation of anonymous HIV testing and access to medical care. Multistate Evaluation of Surveillance of HIV (MESH) Study Group. *JAMA* 1998;280(16):1416-20.
10. Analysis of HIV-1 clinical trials: statistical magic? The AVANTI Steering Committee. *Lancet* 1999;353(9169):2061-4.
11. Mocroft A, Gill MJ, Davidson W, Phillips AN. Predictors of a viral response and subsequent virological treatment failure in patients with HIV starting a protease inhibitor. *AIDS* 1998;12(16):2161-7.
12. Rhone SA, Hogg RS, Yip B, et al. The antiviral effect of ritonavir and saquinavir in combination amongst HIV-infected adults: results from a community-based study. *AIDS* 1998;12(6):619-24.
13. Le Moing V, Chene G, Carrieri MP, et al. Predictors of virological rebound in HIV-1-infected patients initiating a protease inhibitor-containing regimen. *AIDS* 2002;16(1):21-9.
14. Deeks SG, Hecht FM, Swanson M, et al. HIV RNA and CD4 cell count response to protease inhibitor therapy in an urban AIDS clinic: response to both initial and salvage therapy. *AIDS* 1999;13(6):F35-43.
15. Raboud JM, Montaner JS, Conway B, et al. Suppression of plasma viral load below 20 copies/ml is required to achieve a long-term response to therapy. *AIDS* 1998;12(13):1619-24.
16. Carpenter CC, Cooper DA, Fischl MA, et al. Antiretroviral therapy in adults: updated recommendations of the International AIDS Society-USA Panel. *JAMA* 2000;283(3):381-90.

17. de Wolf F, Spijkerman I, Schellekens PT, et al. AIDS prognosis based on HIV-1 RNA, CD4+ T-cell count and function: markers with reciprocal predictive value over time after seroconversion. *AIDS* 1997;11(15):1799-806.
18. Mellors JW, Kingsley LA, Rinaldo CR, Jr., et al. Quantitation of HIV-1 RNA in plasma predicts outcome after seroconversion. *Ann Intern Med* 1995;122(8):573-9.
19. Ioannidis JP, Cappelleri JC, Lau J, Sacks HS, Skolnik PR. Predictive value of viral load measurements in asymptomatic untreated HIV-1 infection: a mathematical model. *AIDS* 1996;10(3):255-62.
20. Keet IP, Janssen M, Veugelers PJ, et al. Longitudinal analysis of CD4 T cell counts, T cell reactivity, and human immunodeficiency virus type 1 RNA levels in persons remaining AIDS-free despite CD4 cell counts 5 years. *J Infect Dis* 1997;176(3):665-71.
21. Spijkerman IJ, Prins M, Goudsmit J, et al. Early and late HIV-1 RNA level and its association with other markers and disease progression in long-term AIDS-free homosexual men. *AIDS* 1997;11(11):1383-8.
22. Henrard DR, Phillips JF, Muenz LR, et al. Natural history of HIV-1 cell-free viremia. *JAMA* 1995;274(7):554-8.
23. Sabin CA, Devereux H, Phillips AN, et al. Course of viral load throughout HIV-1 infection. *J Acquir Immune Defic Syndr* 2000;23(2):172-7.
24. Sabin CA, Devereux H, Phillips AN, Janossy G, Loveday C, Lee CA. Immune markers and viral load after HIV-1 seroconversion as predictors of disease progression in a cohort of haemophilic men. *AIDS* 1998;12(11):1347-52.
25. Deeks SG, Grant RM, Beatty GW, Horton C, Detmer J, Eastman S. Activity of a ritonavir plus saquinavir-containing regimen in patients with virologic evidence of indinavir or ritonavir failure. *AIDS* 1998;12(10):F97-102.

26. Cameron DW, Heath-Chiozzi M, Danner S, et al. Randomised placebo-controlled trial of ritonavir in advanced HIV-1 disease. The Advanced HIV Disease Ritonavir Study Group. *Lancet* 1997;351(9102):543-9.
27. Erb P, Battegay M, Zimmerli W, Rickenbach M, Egger M. Effect of antiretroviral therapy on viral load, CD4 cell count, and progression to acquired immunodeficiency syndrome in a community human immunodeficiency virus-infected cohort. Swiss HIV Cohort Study. *Arch Intern Med* 2000;160(8):1134-40.
28. Gulick RM, Mellors JW, Havlir D, et al. Simultaneous vs sequential initiation of therapy with indinavir, zidovudine, and lamivudine for HIV-1 infection: 100-week follow-up. *JAMA* 1998;280(1):35-41.
29. Eron JJ, Jr. HIV-1 Protease Inhibitors. *Clin Infect Dis* 2000;30(S2):S160-S70.
30. El-Sadr WM, Burman WJ, Grant LB, et al. Discontinuation of prophylaxis for *Mycobacterium avium* complex disease in HIV-infected patients who have a response to antiretroviral therapy. Terry Bein Community Programs for Clinical Research on AIDS. *N Engl J Med* 2000;342(15):1085-92.
31. Furrer H, Egger M, Opravil M, et al. Discontinuation of primary prophylaxis against *Pneumocystis carinii* pneumonia in HIV-1-infected adults treated with combination antiretroviral therapy. Swiss HIV Cohort Study. *N Engl J Med* 1999;340(17):1301-6.
32. Miller V, Staszewski S, Nisius G, Lepri AC, Sabin C, Phillips AN. Risk of new AIDS diseases in people on triple therapy. *Lancet* 1999;353(9151):463.
33. Whitcup SM, Fortin E, Lindblad AS, et al. Discontinuation of anticytomegalovirus therapy in patients with HIV infection and cytomegalovirus retinitis. *JAMA* 1999;282(17):1633-7.

34. Yangco BG, Von Bargen JC, Moorman AC, Holmberg SD. Discontinuation of chemoprophylaxis against *Pneumocystis carinii* pneumonia in patients with HIV infection. HIV Outpatient Study (HOPS) Investigators. *Ann Intern Med* 2000;132(3):201-5.
35. Rosenberg PS. Scope of the AIDS epidemic in the United States. *Science* 1995;270(5240):1372-5.
36. Miller DK, Homan SM. Determining transition probabilities: confusion and suggestions. *Med Decis Making* 1994;14(1):52-8.
37. O'Brien WA, Hartigan PM, Martin D, et al. Changes in plasma HIV-1 RNA and CD4+ lymphocyte counts and the risk of progression to AIDS. Veterans Affairs Cooperative Study Group on AIDS. *N Engl J Med* 1996;334(7):426-31.
38. Brun-Vezinet F, Boucher C, Loveday C, et al. HIV-1 viral load, phenotype, and resistance in a subset of drug-naive participants from the Delta trial. The National Virology Groups. Delta Virology Working Group and Coordinating Committee. *Lancet* 1997;350(9083):983-90.
39. Coombs RW, Welles SL, Hooper C, et al. Association of plasma human immunodeficiency virus type 1 RNA level with risk of clinical progression in patients with advanced infection. AIDS Clinical Trials Group (ACTG) 116B/117 Study Team. ACTG Virology Committee Resistance and HIV-1 RNA Working Groups. *J Infect Dis* 1996;174(4):704-12.
40. Loveday C, Hill A. Prediction of progression to AIDS with serum HIV-1 RNA and CD4 count [letter]. *Lancet* 1995;345(8952):790-1.

41. Montaner JS, DeMasi R, Hill AM. The effects of lamivudine treatment on HIV-1 disease progression are highly correlated with plasma HIV-1 RNA and CD4 cell count. *AIDS* 1998;12(5):F23-8.
42. Welles SL, Jackson JB, Yen-Lieberman B, et al. Prognostic value of plasma human immunodeficiency virus type 1 (HIV-1) RNA levels in patients with advanced HIV-1 disease and with little or no prior zidovudine therapy. AIDS Clinical Trials Group Protocol 116A/116B/117 Team. *J Infect Dis* 1996;174(4):696-703.
43. O'Brien WA, Hartigan PM, Daar ES, Simberkoff MS, Hamilton JD. Changes in plasma HIV RNA levels and CD4+ lymphocyte counts predict both response to antiretroviral therapy and therapeutic failure. VA Cooperative Study Group on AIDS. *Ann Intern Med* 1997;126(12):939-45.
44. Marschner IC, Collier AC, Coombs RW, et al. Use of changes in plasma levels of human immunodeficiency virus type 1 RNA to assess the clinical benefit of antiretroviral therapy. *J Infect Dis* 1998;177(1):40-7.
45. Mellors JW, Rinaldo CR, Jr., Gupta P, White RM, Todd JA, Kingsley LA. Prognosis in HIV-1 infection predicted by the quantity of virus in plasma. *Science* 1996;272(5265):1167-70.
46. Mellors JW, Munoz A, Giorgi JV, et al. Plasma viral load and CD4+ lymphocytes as prognostic markers of HIV-1 infection. *Ann Intern Med* 1997;126(12):946-54.
47. Vlahov D, Graham N, Hoover D, et al. Prognostic indicators for AIDS and infectious disease death in HIV-infected injection drug users: plasma viral load and CD4+ cell count. *JAMA* 1998;279(1):35-40.
48. Hughes MD, Johnson VA, Hirsch MS, et al. Monitoring plasma HIV-1 RNA levels in addition to CD4+ lymphocyte count improves assessment of antiretroviral therapeutic

- response. ACTG 241 Protocol Virology Substudy Team. *Ann Intern Med* 1997;126(12):929-38.
49. Galetto-Lacour A, Yerly S, Perneger TV, Baumberger C, Hirschel B, Perrin L. Prognostic value of viremia in patients with long-standing human immunodeficiency virus infection. Swiss HIV Cohort Study Group. *J Infect Dis* 1996;173(6):1388-93.
50. Katzenstein DA, Hammer SM, Hughes MD, et al. The relation of virologic and immunologic markers to clinical outcomes after nucleoside therapy in HIV-infected adults with 200 to 500 CD4 cells per cubic millimeter. AIDS Clinical Trials Group Study 175 Virology Study Team. *N Engl J Med* 1996;335(15):1091-8.
51. O'Brien TR, Blattner WA, Waters D, et al. Serum HIV-1 RNA levels and time to development of AIDS in the Multicenter Hemophilia Cohort Study. *JAMA* 1996;276(2):105-10.
52. Pedersen C, Katzenstein T, Nielsen C, Lundgren JD, Gerstoft J. Prognostic value of serum HIV-RNA levels at virologic steady state after seroconversion: relation to CD4 cell count and clinical course of primary infection. *J Acquir Immune Defic Syndr Hum Retrovirol* 1997;16(2):93-9.
53. Phillips AN, Eron JJ, Bartlett JA, et al. HIV-1 RNA levels and the development of clinical disease. North American Lamivudine HIV Working Group. *AIDS* 1996;10(8):859-65.
54. Phillips AN, Eron J, Bartlett J, et al. Correspondence between the effect of zidovudine plus lamivudine on plasma HIV level/CD4 lymphocyte count and the incidence of clinical disease in infected individuals. North American Lamivudine HIV Working Group. *AIDS* 1997;11(2):169-75.

55. Yerly S, Perneger TV, Hirschel B, et al. A critical assessment of the prognostic value of HIV-1 RNA levels and CD4+ cell counts in HIV-infected patients. The Swiss HIV Cohort Study. Arch Intern Med 1998;158(3):247-52.
56. Chêne G, Binquet C, Moreau JF, et al. Changes in CD4+ cell count and the risk of opportunistic infection or death after highly active antiretroviral treatment. Groupe d'Epidémiologie Clinique du SIDA en Aquitaine. AIDS 1998;12(17):2313-20.
57. Anderson RN. United States life tables, 1997. Hyattsville, Maryland: National Center for Health Statistics; 1999 December 13, 1999. Report No.: National vital statistics reports; vol 47 no. 28.
58. Yeni PG, Hammer SM, Hirsch MS, et al. Treatment for adult HIV infection: 2004 recommendations of the International AIDS Society-USA Panel. JAMA 2004;292(2):251-65.
59. Panel on Clinical Practices for Treatment of HIV Infection. Guidelines for the Use of Antiretroviral Agents in HIV-Infected Adults and Adolescents. Bethesda, MD: Department of Health and Human Services; 2004 March 23. Report No.: [http://aidsinfo.nih.gov/guidelines/adult/AA\\_032304.pdf](http://aidsinfo.nih.gov/guidelines/adult/AA_032304.pdf).
60. Lucas GM, Chaisson RE, Moore RD. Highly active antiretroviral therapy in a large urban clinic: risk factors for virologic failure and adverse drug reactions. Ann Intern Med 1999;131(2):81-7.
61. Bonfanti P, Valsecchi L, Parazzini F, et al. Incidence of adverse reactions in HIV patients treated with protease inhibitors: a cohort study. Coordinamento Italiano Studio Allergia e Infezione da HIV (CISAI) Group. J Acquir Immune Defic Syndr 2000;23(3):236-45.

62. Valdez H, Lederman MM, Woolley I, et al. Human immunodeficiency virus 1 protease inhibitors in clinical practice: predictors of virological outcome. *Arch Intern Med* 1999;159(15):1771-6.
63. Kaufmann GR, Duncombe C, Cunningham P, et al. Treatment response and durability of a double protease inhibitor therapy with saquinavir and ritonavir in an observational cohort of HIV-1-infected individuals. *AIDS* 1998;12(13):1625-30.
64. Powderly WG, Saag MS, Chapman S, Yu G, Quart B, Clendeninn NJ. Predictors of optimal virological response to potent antiretroviral therapy. *AIDS* 1999;13(14):1873-80.
65. Bernasconi E, Magenta L, Piffaretti JC, Carota A, Moccetti T. Are nelfinavir-containing regimens effective as second-line triple therapy? [letter]. *AIDS* 2000;14(1):95-6.
66. Bonfanti P, Capetti A, Di Mattei P, Niero F, Rizzardini G. Virological treatment failure of highly active antiretroviral therapy in an unselected cohort of HIV-infected patients [letter]. *AIDS* 1998;12(9):1111.
67. Casado JL, Perez-Elias MJ, Antela A, et al. Predictors of long-term response to protease inhibitor therapy in a cohort of HIV-infected patients. *AIDS* 1998;12(11):F131-5.
68. Cohen Stuart JW, Schuurman R, Burger DM, et al. Randomized trial comparing saquinavir soft gelatin capsules versus indinavir as part of triple therapy (CHEESE study). *AIDS* 1999;13(7):F53-8.
69. d'Arminio Monforte A, Testa L, Adorni F, et al. Clinical outcome and predictive factors of failure of highly active antiretroviral therapy in antiretroviral-experienced patients in advanced stages of HIV-1 infection. *AIDS* 1998;12(13):1631-7.
70. Fätkenheuer G, Theisen A, Rockstroh J, et al. Virological treatment failure of protease inhibitor therapy in an unselected cohort of HIV-infected patients. *AIDS* 1997;11(14):F113-6.

71. Guardiola JM, Domingo P, Vazquez G. Switching HIV-1 protease inhibitor therapy: which? When? And why? [letter]. *Arch Intern Med* 1999;159(2):194-5.
72. Gulick RM, Mellors JW, Havlir D, et al. Treatment with indinavir, zidovudine, and lamivudine in adults with human immunodeficiency virus infection and prior antiretroviral therapy. *N Engl J Med* 1997;337(11):734-9.
73. Hammer SM, Squires KE, Hughes MD, et al. A controlled trial of two nucleoside analogues plus indinavir in persons with human immunodeficiency virus infection and CD4 cell counts of 200 per cubic millimeter or less. AIDS Clinical Trials Group 320 Study Team. *N Engl J Med* 1997;337(11):725-33.
74. Hogg RS, Rhone SA, Yip B, et al. Antiviral effect of double and triple drug combinations amongst HIV- infected adults: lessons from the implementation of viral load-driven antiretroviral therapy. *AIDS* 1998;12(3):279-84.
75. Kirk O, Katzenstein TL, Gerstoft J, et al. Combination therapy containing ritonavir plus saquinavir has superior short-term antiretroviral efficacy: a randomized trial. *AIDS* 1999;13(1):F9-16.
76. Ledergerber B, Egger M, Opravil M, et al. Clinical progression and virological failure on highly active antiretroviral therapy in HIV-1 patients: a prospective cohort study. Swiss HIV Cohort Study. *Lancet* 1999;353(9156):863-8.
77. Montaner JS, Reiss P, Cooper D, et al. A randomized, double-blind trial comparing combinations of nevirapine, didanosine, and zidovudine for HIV-infected patients: the INCAS Trial. Italy, The Netherlands, Canada and Australia Study. *JAMA* 1998;279(12):930-7.
78. Moyle G, Pozniak A, Opravil M, et al. The SPICE study: 48-week activity of combinations of saquinavir soft gelatin and nelfinavir with and without nucleoside

- analogues. Study of Protease Inhibitor Combinations in Europe. *J Acquir Immune Defic Syndr* 2000;23(2):128-37.
79. Notermans DW, Jurriaans S, de Wolf F, et al. Decrease of HIV-1 RNA levels in lymphoid tissue and peripheral blood during treatment with ritonavir, lamivudine and zidovudine. Ritonavir/3TC/ZDV Study Group. *AIDS* 1998;12(2):167-73.
80. Paredes R, Puig T, Arno A, et al. High-dose saquinavir plus ritonavir: long-term efficacy in HIV-positive protease inhibitor-experienced patients and predictors of virologic response. *J Acquir Immune Defic Syndr* 1999;22(2):132-8.
81. Paris D, Ledergerber B, Weber R, et al. Incidence and predictors of virologic failure of antiretroviral triple-drug therapy in a community-based cohort. *AIDS Res Hum Retroviruses* 1999;15(18):1631-8.
82. Roca B, Gomez CJ, Arnedo A. Stavudine, lamivudine and indinavir in drug abusing and non-drug abusing HIV-infected patients: adherence, side effects and efficacy. *J Infect* 1999;39(2):141-5.
83. Salzberger B, Rockstroh J, Wieland U, et al. Clinical efficacy of protease inhibitor based antiretroviral combination therapy--a prospective cohort study. *Eur J Med Res* 1999;4(11):449-55.
84. Staszewski S, Morales-Ramirez J, Tashima KT, et al. Efavirenz plus zidovudine and lamivudine, efavirenz plus indinavir, and indinavir plus zidovudine and lamivudine in the treatment of HIV-1 infection in adults. Study 006 Team. *N Engl J Med* 1999;341(25):1865-73.
85. van Roon EN, Verzijl JM, Juttman JR, Lenderink AW, Blans MJ, Egberts AC. Incidence of discontinuation of highly active antiretroviral combination therapy

- (HAART) and its determinants. *J Acquir Immune Defic Syndr Hum Retrovirol* 1999;20(3):290-4.
86. Butcher D, Greene J, Duong P, Markson L. Virologic response associated with a change in protease inhibitor therapy [letter]. *Arch Intern Med* 2000;160(3):394-5.
  87. Cameron DW, Japour AJ, Xu Y, et al. Ritonavir and saquinavir combination therapy for the treatment of HIV infection. *AIDS* 1999;13(2):213-24.
  88. Maher K, Klimas N, Fletcher MA, et al. Disease progression, adherence, and response to protease inhibitor therapy for HIV infection in an Urban Veterans Affairs Medical Center. *J Acquir Immune Defic Syndr* 1999;22(4):358-63.
  89. Clough LA, D'Agata E, Raffanti S, Haas DW. Factors that predict incomplete virological response to protease inhibitor-based antiretroviral therapy. *Clin Infect Dis* 1999;29(1):75-81.
  90. De Wit S, Cassano P, Hermans P, et al. Salvage therapy with ritonavir-saquinavir plus two nucleoside reverse transcriptase inhibitors in patients failing with amprenavir-zidovudine- lamivudine [letter]. *AIDS* 1999;13(7):864-5.
  91. Paredes R, Mocroft A, Kirk O, et al. Predictors of virological success and ensuing failure in HIV-positive patients starting highly active antiretroviral therapy in Europe: results from the EuroSIDA study. *Arch Intern Med* 2000;160(8):1123-32.
  92. Roca B, Gomez CJ, Arnedo A. A randomized, comparative study of lamivudine plus stavudine, with indinavir or nelfinavir, in treatment-experienced HIV-infected patients. *AIDS* 2000;14(2):157-61.
  93. Bellman PC. Clinical experience with adding delavirdine to combination therapy in patients in whom multiple antiretroviral treatment including protease inhibitors has failed. *AIDS* 1998;12(11):1333-40.

94. Zolopa AR, Shafer RW, Warford A, et al. HIV-1 genotypic resistance patterns predict response to saquinavir-ritonavir therapy in patients in whom previous protease inhibitor therapy had failed. *Ann Intern Med* 1999;131(11):813-21.
95. Shulman NS, Zolopa AR, Passaro DJ, et al. Efavirenz- and adefovir dipivoxil-based salvage therapy in highly treatment-experienced patients: clinical and genotypic predictors of virologic response. *J Acquir Immune Defic Syndr* 2000;23(3):221-6.
96. Hall CS, Raines CP, Barnett SH, Moore RD, Gallant JE. Efficacy of salvage therapy containing ritonavir and saquinavir after failure of single protease inhibitor-containing regimens. *AIDS* 1999;13(10):1207-12.
97. Cohen C, Hunt S, Sension M, et al. Phenotypic resistance testing significantly improves response to therapy (Tx): a randomized trial (VIRA 3001). In: 7th Conference on Retroviruses and Opportunistic Infections; 2000 January 30-February 2; San Francisco, CA; 2000.
98. Durant J, Clevenbergh P, Halfon P, et al. Drug-resistance genotyping in HIV-1 therapy: the VIRADAPT randomised controlled trial. *Lancet* 1999;353(9171):2195-9.
99. Pialoux G, Raffi F, Brun-Vezinet F, et al. A randomized trial of three maintenance regimens given after three months of induction therapy with zidovudine, lamivudine, and indinavir in previously untreated HIV-1-infected patients. Trilege (Agence Nationale de Recherches sur le SIDA 072) Study Team. *N Engl J Med* 1998;339(18):1269-76.
100. Havlir DV, Marschner IC, Hirsch MS, et al. Maintenance antiretroviral therapies in HIV-Infected subjects with undetectable plasma HIV RNA after triple-drug therapy. *N Engl J Med* 1998;339(18):1261-8.
101. Gulick RM, Mellors JW, Havlir D, et al. 3-year suppression of HIV viremia with indinavir, zidovudine, and lamivudine. *Ann Intern Med* 2000;133(1):35-9.

102. Raboud JM, Rae S, Vella S, et al. Meta-analysis of two randomized controlled trials comparing combined zidovudine and didanosine therapy with combined zidovudine, didanosine, and nevirapine therapy in patients with HIV. INCAS study team. *J Acquir Immune Defic Syndr* 1999;22(3):260-6.
103. Staszewski S, Miller V, Sabin C, Berger A, Hill AM, Phillips AN. Rebound of HIV-1 viral load after suppression to very low levels [letter]. *AIDS* 1998;12(17):2360.
104. D'Amato RM, D'Aquila RT, Wein LM. Management of antiretroviral therapy for HIV infection: modelling when to change therapy. *Antivir Ther* 1998;3(3):147-58.
105. d'Arminio Monforte A, Lepri AC, Rezza G, et al. Insights into the reasons for discontinuation of the first highly active antiretroviral therapy (HAART) regimen in a cohort of antiretroviral naive patients. I.CO.N.A. Study Group. Italian Cohort of Antiretroviral-Naive Patients. *AIDS* 2000;14(5):499-507.
106. Kempf DJ, Rode RA, Xu Y, et al. The duration of viral suppression during protease inhibitor therapy for HIV-1 infection is predicted by plasma HIV-1 RNA at the nadir. *AIDS* 1998;12(5):F9-14.
107. Tebas P, Patick AK, Kane EM, et al. Virologic responses to a ritonavir--saquinavir-containing regimen in patients who had previously failed nelfinavir. *AIDS* 1999;13(2):F23-8.
108. Sullivan AK, Nelson MR, Moyle GJ, Newell AM, Feher MD, Gazzard BG. Coronary artery disease occurring with protease inhibitor therapy. *Int J STD AIDS* 1998;9(11):711-2.
109. Safrin S, Grunfeld C. Fat distribution and metabolic changes in patients with HIV infection. *AIDS* 1999;13(18):2493-505.

110. Reijers MHE, Weigel HM, Hart AAM, et al. Toxicity and drug exposure in a quadruple drug regimen in HIV-1 infected patients participating in the ADAM study. *AIDS* 2000;14(1):59-68.
111. Saag MS, Holodniy M, Kuritzkes DR, et al. HIV viral load markers in clinical practice. *Nat Med* 1996;2(6):625-9.
112. Cook J, Dasbach E, Coplan P, et al. Modeling the long-term outcomes and costs of HIV antiretroviral therapy using HIV RNA levels: application to a clinical trial. *AIDS Res Hum Retroviruses* 1999;15(6):499-508.
113. Mezzaroma I, Carlesimo M, Pinter E, et al. Clinical and immunologic response without decrease in virus load in patients with AIDS after 24 months of highly active antiretroviral therapy. *Clin Infect Dis* 1999;29(6):1423-30.
114. Piketty C, Castiel P, Belec L, et al. Discrepant responses to triple combination antiretroviral therapy in advanced HIV disease. *AIDS* 1998;12(7):745-50.
115. Drusano GL, Stein DS. Mathematical modeling of the interrelationship of CD4 lymphocyte count and viral load changes induced by the protease inhibitor indinavir. *Antimicrob Agents Chemother* 1998;42(2):358-61.
116. Keita-Perse O, Roger PM, Pradier C, Pugliese P, Cottalorda J, Dellamonica P. Do viral load and CD8 cell count at initiation of tritherapy influence the increase of CD4 T-cell count? *AIDS* 1998;12(15):F175-9.
117. Honiden S, Nease RF, Sundaram V, Holodniy M, Owens DK. The effect of diagnosis with HIV infection on quality of life [Abstract]. *Med Decis Making* 2002;22:560.
118. Tsevat J, Solzan JG, Kuntz KM, et al. Health values of patients infected with human immunodeficiency virus. Relationship to mental health and physical functioning. *Medical Care* 1996;34(1):44-57.

119. Tsevat J, Sherman SN, McElwee JA, et al. The will to live among HIV-infected patients. *Annals of Internal Medicine* 1999;131(3):194-8.
120. Revicki DA, Wu AW, Murray MI. Change in clinical status, health status, and health utility outcomes in HIV-infected patients. *Medical Care* 1995;33, Supplement(4):AS173-AS82.
121. Tengs TO, Lin TH. A meta-analysis of utility estimates for HIV/AIDS. *Med Decis Making* 2002;22(6):475-81.
122. Bayoumi AM, Redelmeier DA. Preventing *Mycobacterium avium* complex in patients who are using protease inhibitors: a cost-effectiveness analysis. *AIDS* 1998;12(12):1503-12.
123. Bozzette SA, Joyce G, McCaffrey DF, et al. Expenditures for the care of HIV-infected patients in the era of highly active antiretroviral therapy. *New England Journal of Medicine* 2001;344(11):817-23.
124. Drugs for HIV infection. *Med Lett Drugs Ther* 2000;42(1069):1-6.
125. United States General Accounting Office. HIV/AIDS drugs: funding implications of new combination therapies for federal and state programs. 1998.
126. Mole L, Ockrim K, Holodniy M. Decreased medical expenditures for care of HIV-seropositive patients. The impact of highly active antiretroviral therapy at a US Veterans Affairs Medical Center. *Pharmacoeconomics* 1999;16(3):307-15.
127. Keiser P, Kvanli MB, Turner D, et al. Protease inhibitor-based therapy is associated with decreased HIV-related health care costs in men treated at a Veterans Administration hospital. *J Acquir Immune Defic Syndr Hum Retrovirol* 1999;20(1):28-33.

128. Gable CB, Tierce JC, Simison D, Ward D, Motte K. Costs of HIV+/AIDS at CD4+ counts disease stages based on treatment protocols. *J Acquir Immune Defic Syndr Hum Retrovirol* 1996;12(4):413-20.
129. Budget of the United States Government. Section 10 - Gross Domestic Product and Implicit Outlay Deflators. 2004. (Accessed November 1, 2004, at
130. Mankiw N. *Principles of Economics*. 2nd ed. Orlando, FL: Harcourt College Publishers; 2001.
131. Deschamps MM, Pape JW, Hafner A, Johnson WD, Jr. Heterosexual transmission of HIV in Haiti. *Ann Intern Med* 1996;125(4):324-30.
132. de Vincenzi I. A longitudinal study of human immunodeficiency virus transmission by heterosexual partners. European Study Group on Heterosexual Transmission of HIV. *N Engl J Med* 1994;331(6):341-6.
133. Padian NS, Shiboski SC, Glass SO, Vittinghoff E. Heterosexual transmission of human immunodeficiency virus (HIV) in northern California: results from a ten-year study. *Am J Epidemiol* 1997;146(4):350-7.
134. Operskalski EA, Stram DO, Busch MP, et al. Role of viral load in heterosexual transmission of human immunodeficiency virus type 1 by blood transfusion recipients. Transfusion Safety Study Group. *Am J Epidemiol* 1997;146(8):655-61.
135. Musicco M, Lazzarin A, Nicolosi A, et al. Antiretroviral treatment of men infected with human immunodeficiency virus type 1 reduces the incidence of heterosexual transmission. Italian Study Group on HIV Heterosexual Transmission. *Arch Intern Med* 1994;154(17):1971-6.
136. Buchbinder SP, Douglas JM, Jr., McKirnan DJ, Judson FN, Katz MH, MacQueen KM. Feasibility of human immunodeficiency virus vaccine trials in homosexual men in the

- United States: risk behavior, seroincidence, and willingness to participate. *J Infect Dis* 1996;174(5):954-61.
137. Caceres CF, van Griensven GJ. Male homosexual transmission of HIV-1. *AIDS* 1994;8(8):1051-61.
  138. Keet IP, Albrecht van Lent N, Sandfort TG, Coutinho RA, van Griensven GJ. Orogenital sex and the transmission of HIV among homosexual men. *AIDS* 1992;6(2):223-6.
  139. Samuel MC, Hessel N, Shiboski S, Engel RR, Speed TP, Winkelstein W, Jr. Factors associated with human immunodeficiency virus seroconversion in homosexual men in three San Francisco cohort studies, 1984-1989. *J Acquir Immune Defic Syndr* 1993;6(3):303-12.
  140. Holtgrave DR. Estimation of annual HIV transmission rates in the United States, 1978-2000. *J Acquir Immune Defic Syndr* 2004;35(1):89-92.
  141. The NIMH Multisite HIV Prevention Trial: reducing HIV sexual risk behavior. The National Institute of Mental Health (NIMH) Multisite HIV Prevention Trial Group. *Science* 1998;280(5371):1889-94.
  142. Kamb ML, Fishbein M, Douglas JM, Jr., et al. Efficacy of risk-reduction counseling to prevent human immunodeficiency virus and sexually transmitted diseases: a randomized controlled trial. Project RESPECT Study Group. *JAMA* 1998;280(13):1161-7.
  143. DiClemente RJ, Wingood GM. A randomized controlled trial of an HIV sexual risk-reduction intervention for young African-American women. *JAMA* 1995;274(16):1271-6.
  144. Quinn TC, Wawer MJ, Sewankambo N, et al. Viral load and heterosexual transmission of human immunodeficiency virus type 1. Rakai Project Study Group. *New England Journal of Medicine* 2000;342(13):921-9.

145. Zaric GS, Barnett PG, Brandeau ML. HIV transmission and the cost-effectiveness of methadone maintenance. *Am J Public Health* 2000;90(7):1100-11.
146. Hu DJ, Subbarao S, Vanichseni S, et al. Higher viral loads and other risk factors associated with HIV-1 seroconversion during a period of high incidence among injection drug users in Bangkok. *J Acquir Immune Defic Syndr* 2002;30(2):240-7.
147. Kotranski L, Semaan S, Collier K, Lauby J, Halbert J, Feighan K. Effectiveness of an HIV risk reduction counseling intervention for out-of-treatment drug users. *AIDS Education and Prevention* 1998;10(1):19-33.

## WEB ONLY APPENDIX FIGURE LEGENDS

**Figure 1. Schematic Representation of the Decision Model.** In panel A, the square node at the left represents the decision to screen for HIV or not. The patient's health thereafter is simulated by a Markov model. Patients may enter the model with prevalent HIV infection (asymptomatic or symptomatic HIV or AIDS) or they may be uninfected. Each month, uninfected patients are at risk of developing HIV infection. Patients who have asymptomatic disease may progress to symptomatic HIV or remain in the asymptomatic health state. Patients that have symptomatic HIV infection may progress to an AIDS defining condition, or may remain with symptomatic HIV. Patients with AIDS may either die from their infection or remain with AIDS. Each month all patients may be identified either through a voluntary screening program in the HIV screen arm, or through symptom-based case finding in the symptomatic HIV and AIDS health states in both the HIV screen arm and the No Screening arm. Throughout the patients' lifetime, all patients are at risk for non-HIV related mortality. Panel B shows the possible paths of patients identified with HIV and started on highly active antiretroviral therapy (HAART). Each month a patient on HAART may experience toxicity from their regimen or tolerate the drugs. Those who experience toxicity are switched to a new regimen. Those patients without toxicity may have their viral load suppressed or not. Once an unsuppressed viral load is identified through viral load testing, the patient is switched to a new drug regimen. Each month, all HIV patients are at risk for progression to AIDS. Such progression is considered a treatment failure and once identified the patient is switched to a new drug regimen.

**Figure 2. Transition Between Antiretroviral Regimens.** Patients initially used suppressive therapy (top box). When no further suppressive regimens were available, patients used non-

suppressive therapy (bottom box). Within suppressive therapy, patients could change regimens due to intolerance (horizontal arrow) or after experiencing inefficacy (vertical arrow). Each patient used three suppressive therapy regimens before starting non-suppressive therapy.

**Figure 3. Age- and Gender-Specific Incidence.** Based on work by Rosenberg<sup>35</sup> our model incorporated age- and gender-specific incidence of HIV throughout the patient's lifetime.

**Figure 4. Relationship Between CD4 Count and Annual Probability of Symptom-Based Case Finding.** The probability of a patient being identified through symptom-based case finding was based on their CD4 count. For patients with a CD4 count above 350 cell/ $\mu$ L we assumed that the probability of being found through symptom-based case finding was 0. At a CD4 count of 50 cell/ $\mu$ L we assumed that 80% of patients would be found annually based on their symptoms.

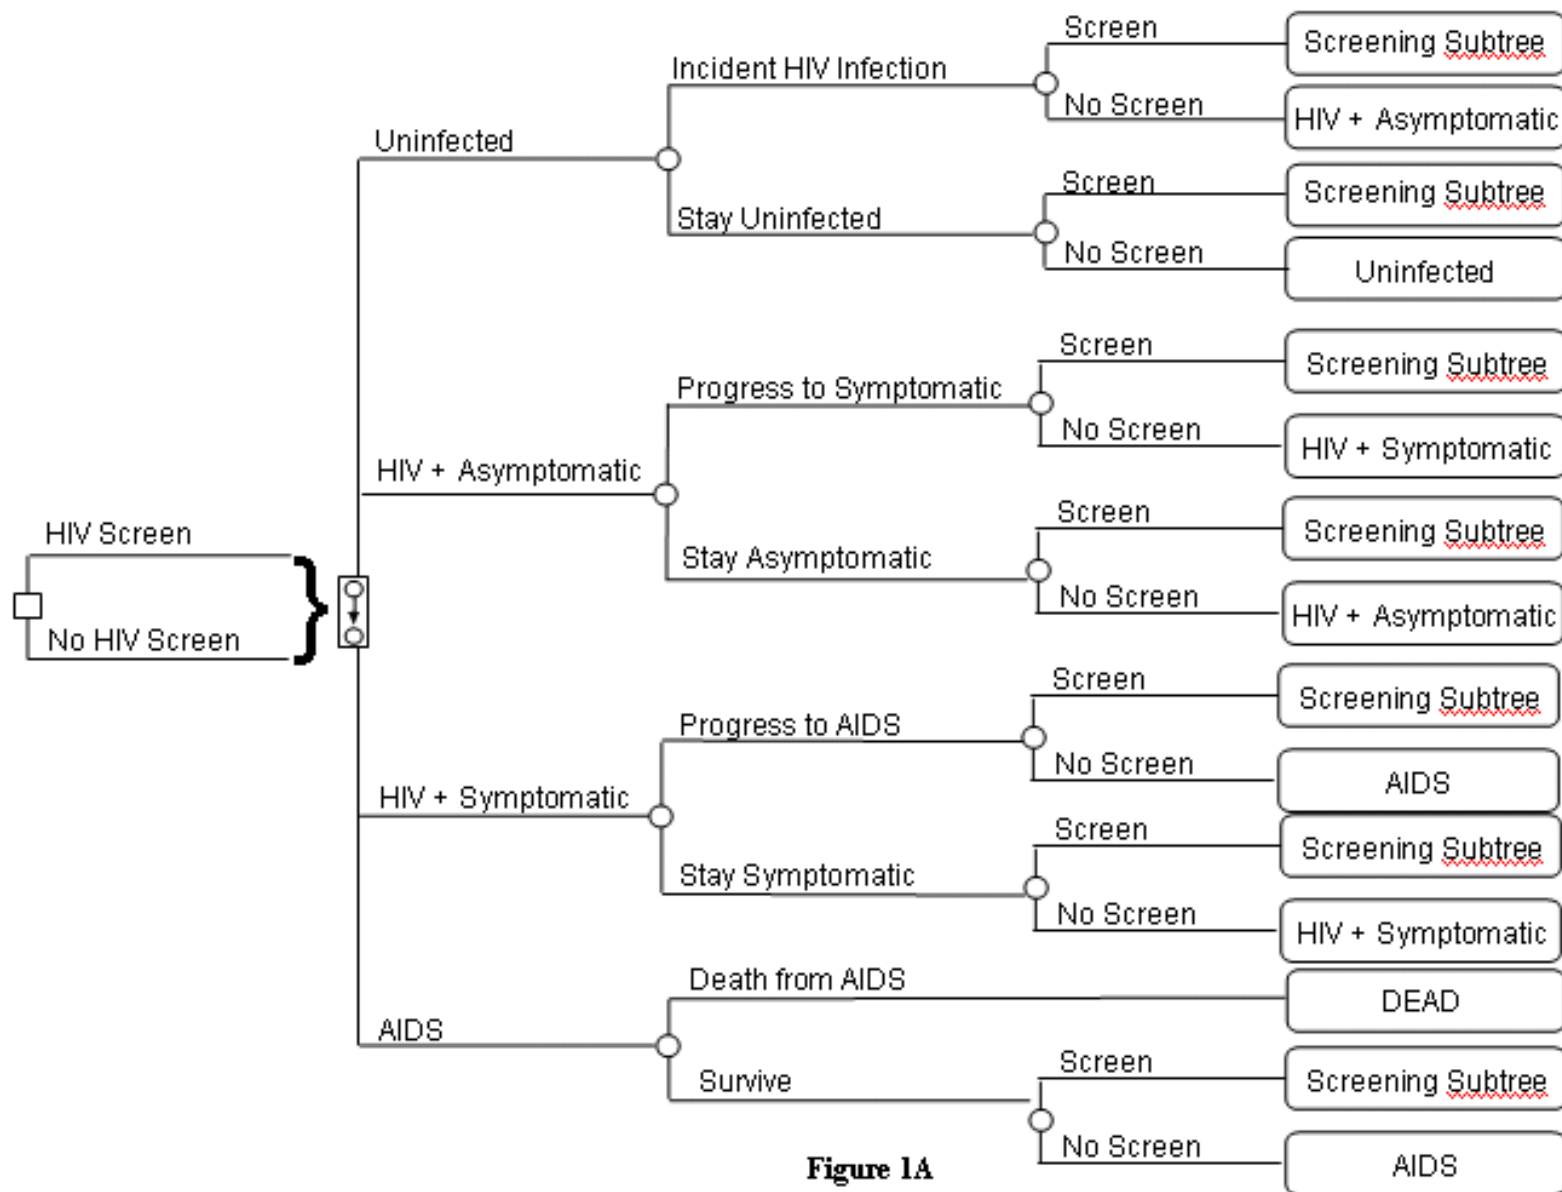

**Figure 1A**

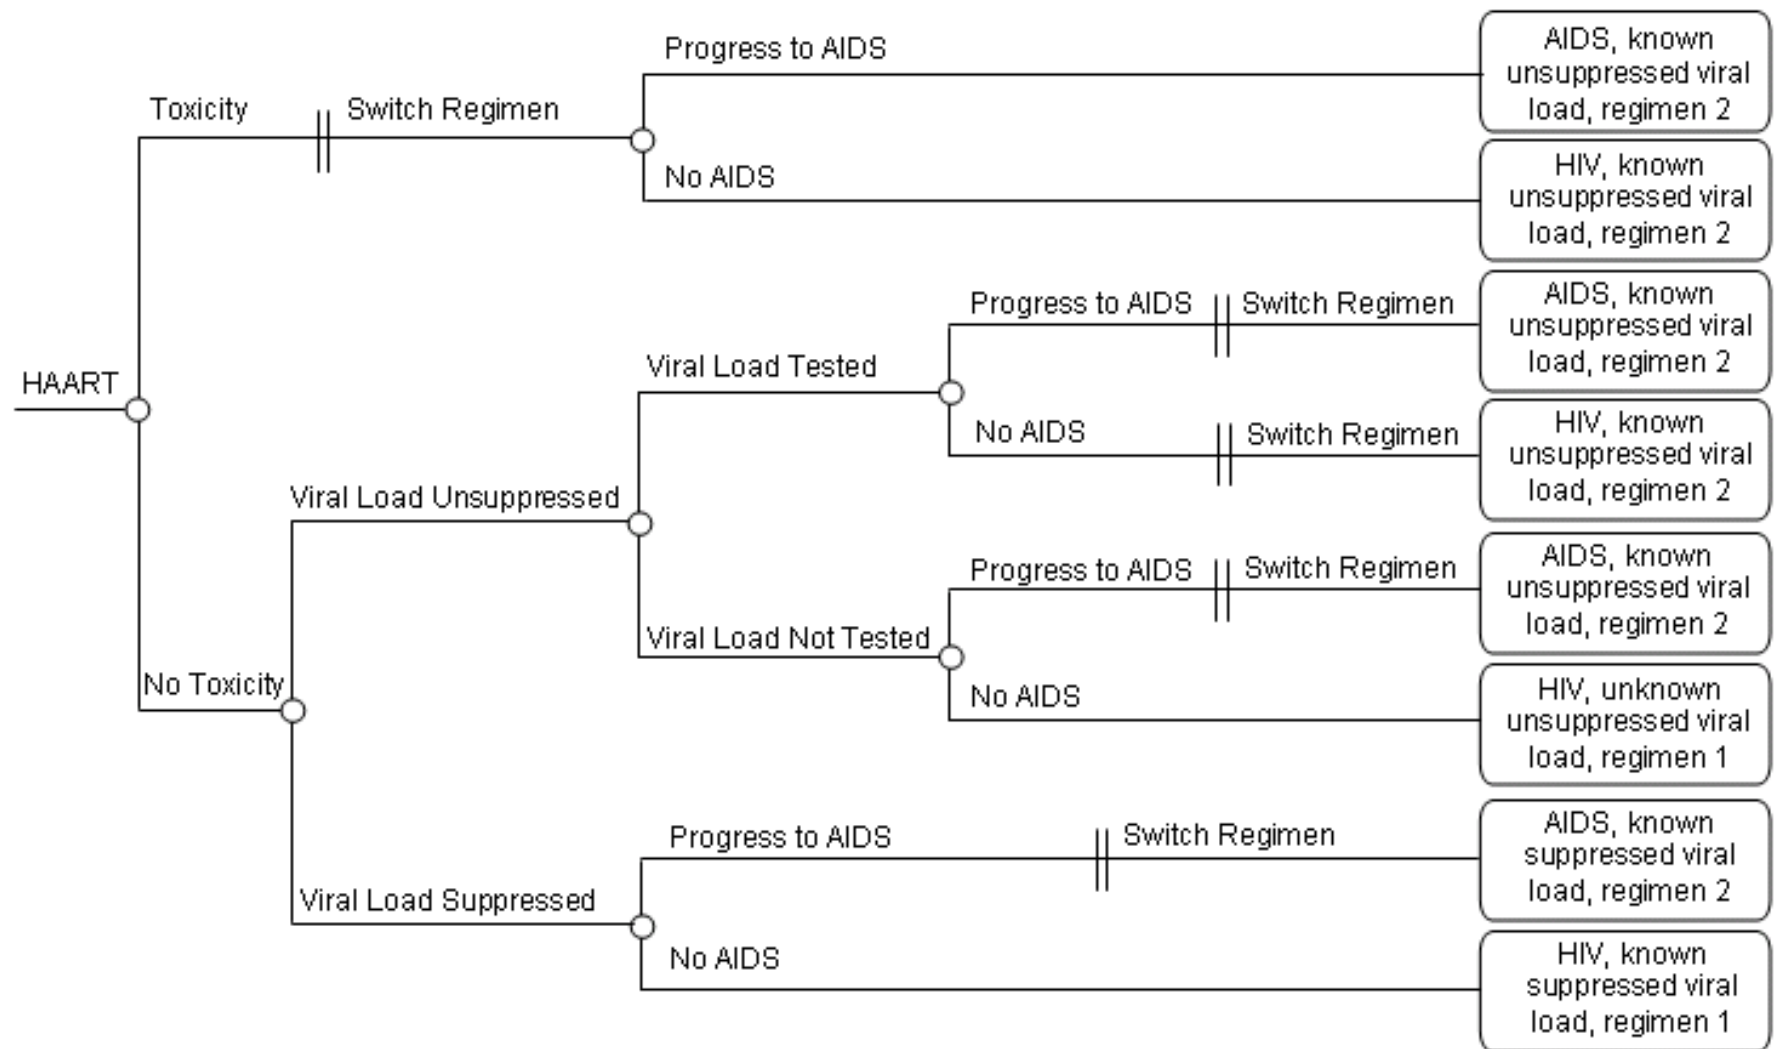

**Figure 1B**

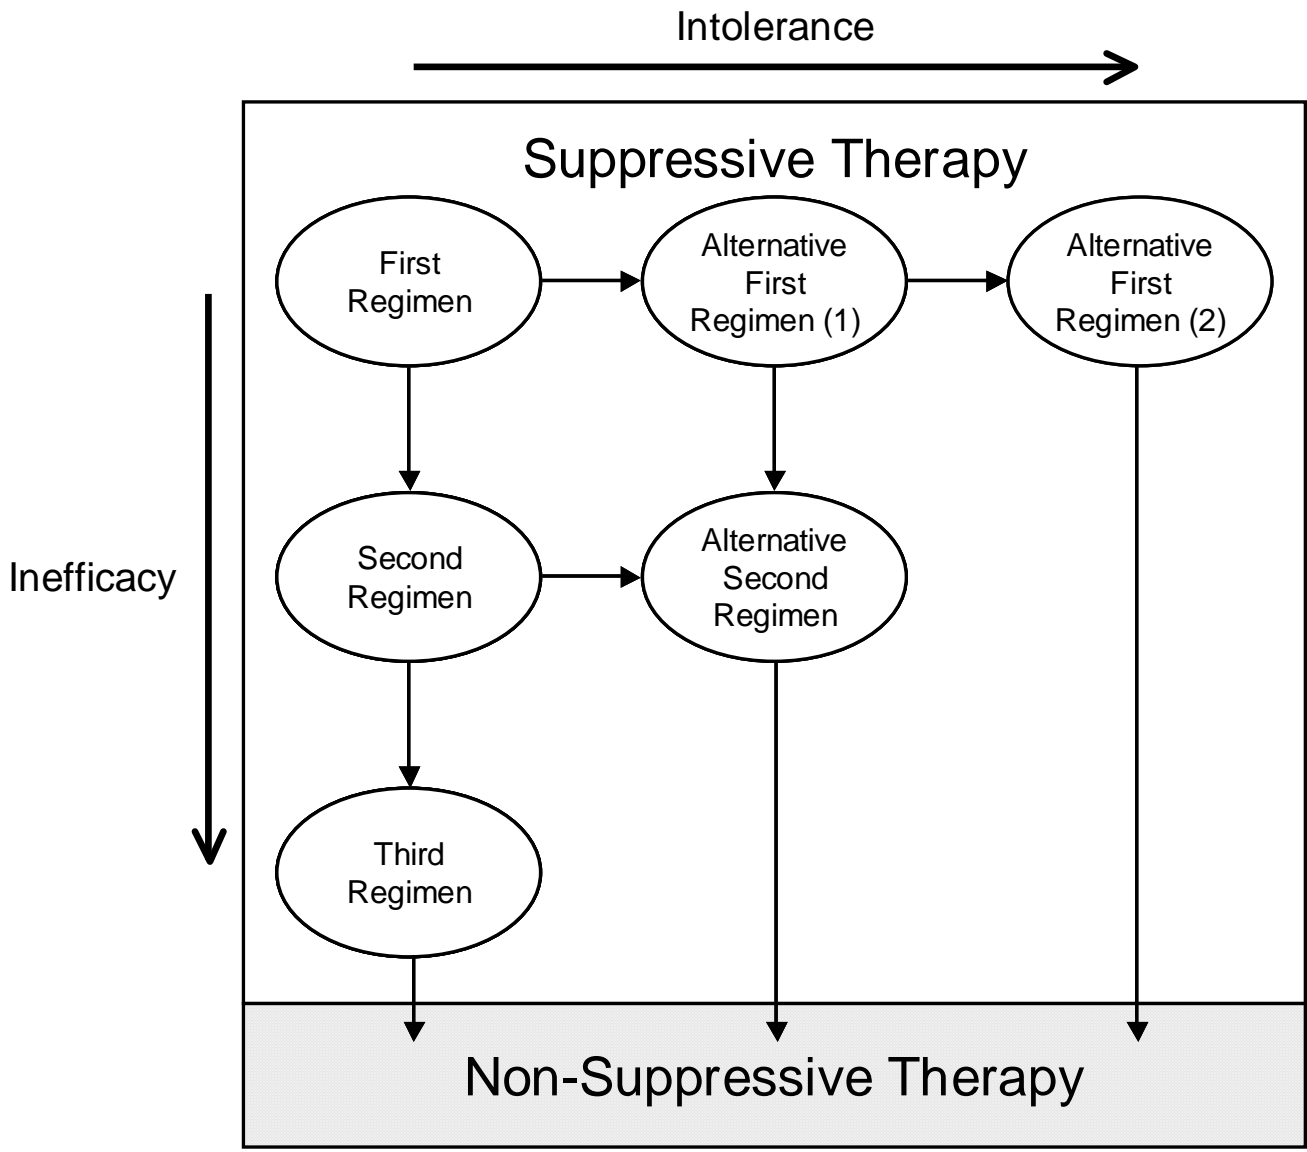

**Figure 2**

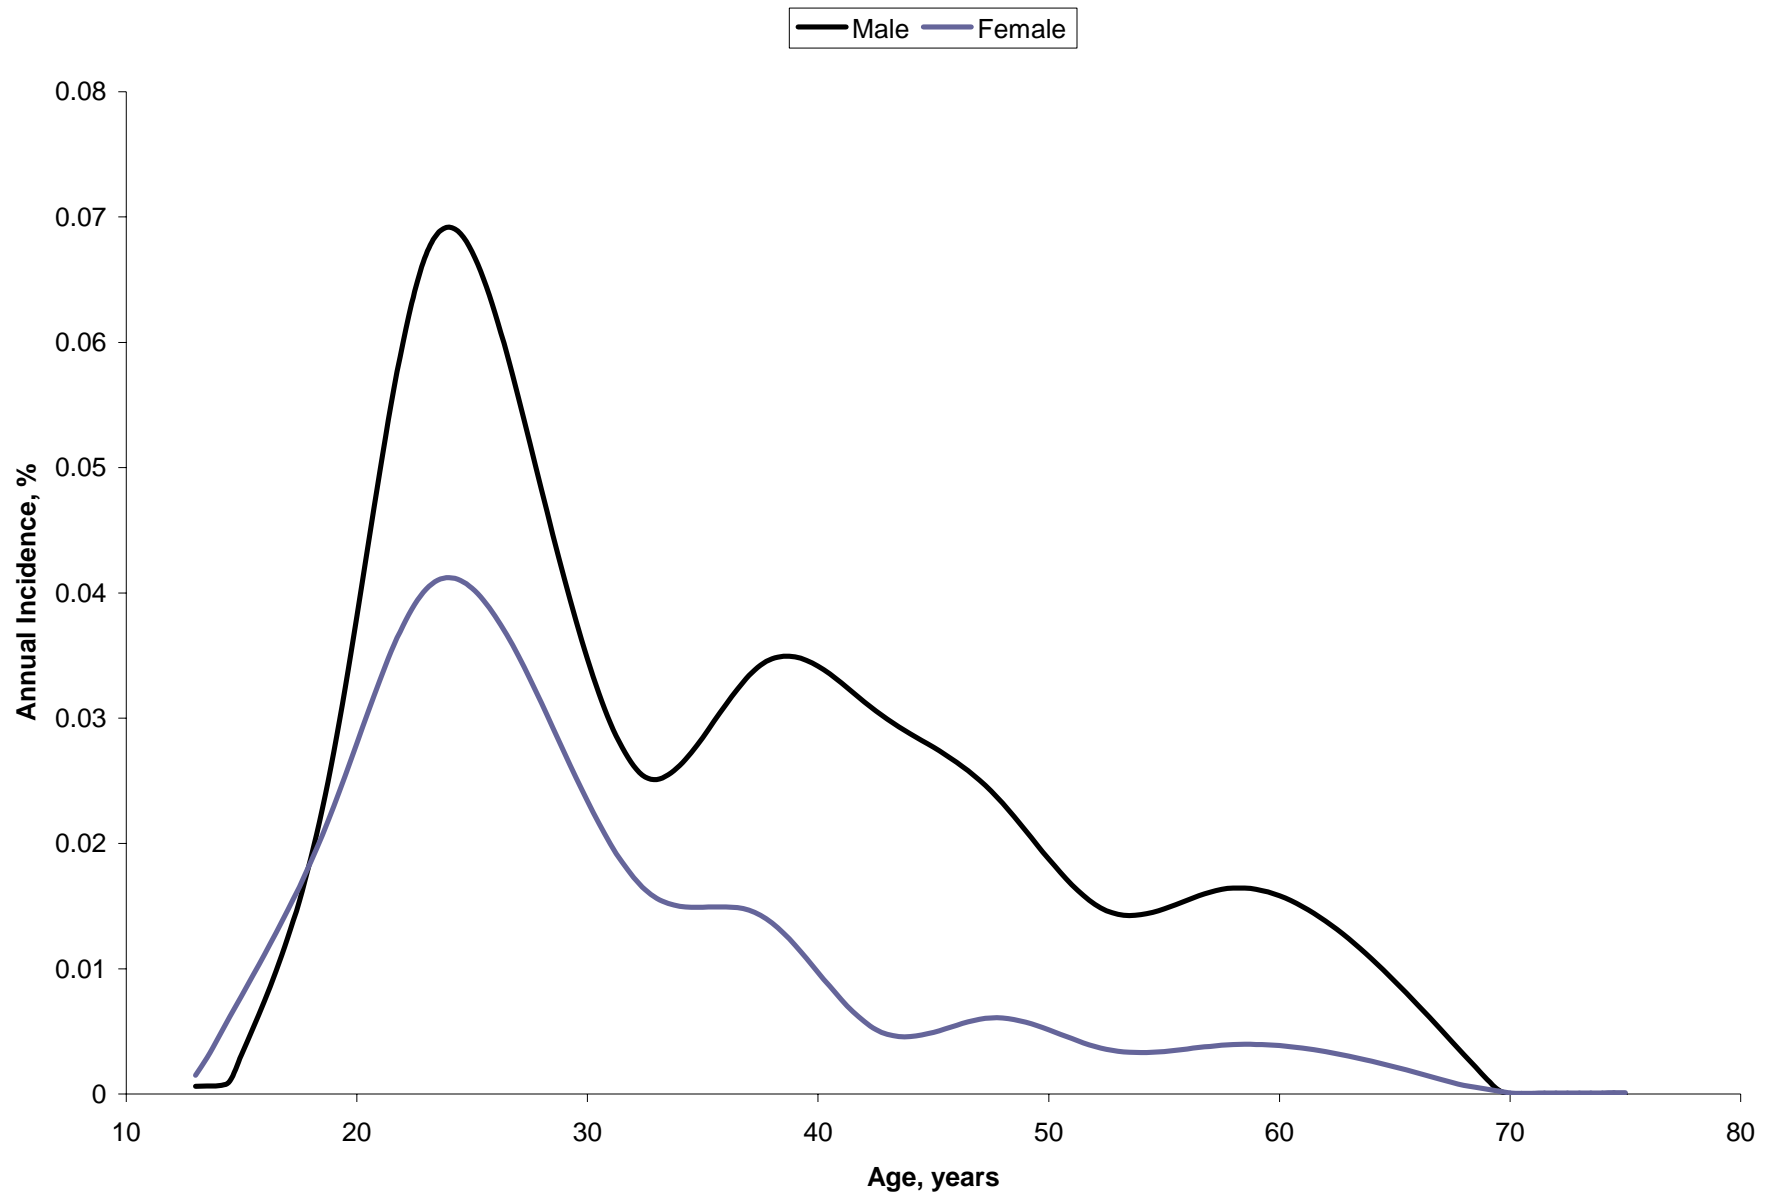

**Figure 3**

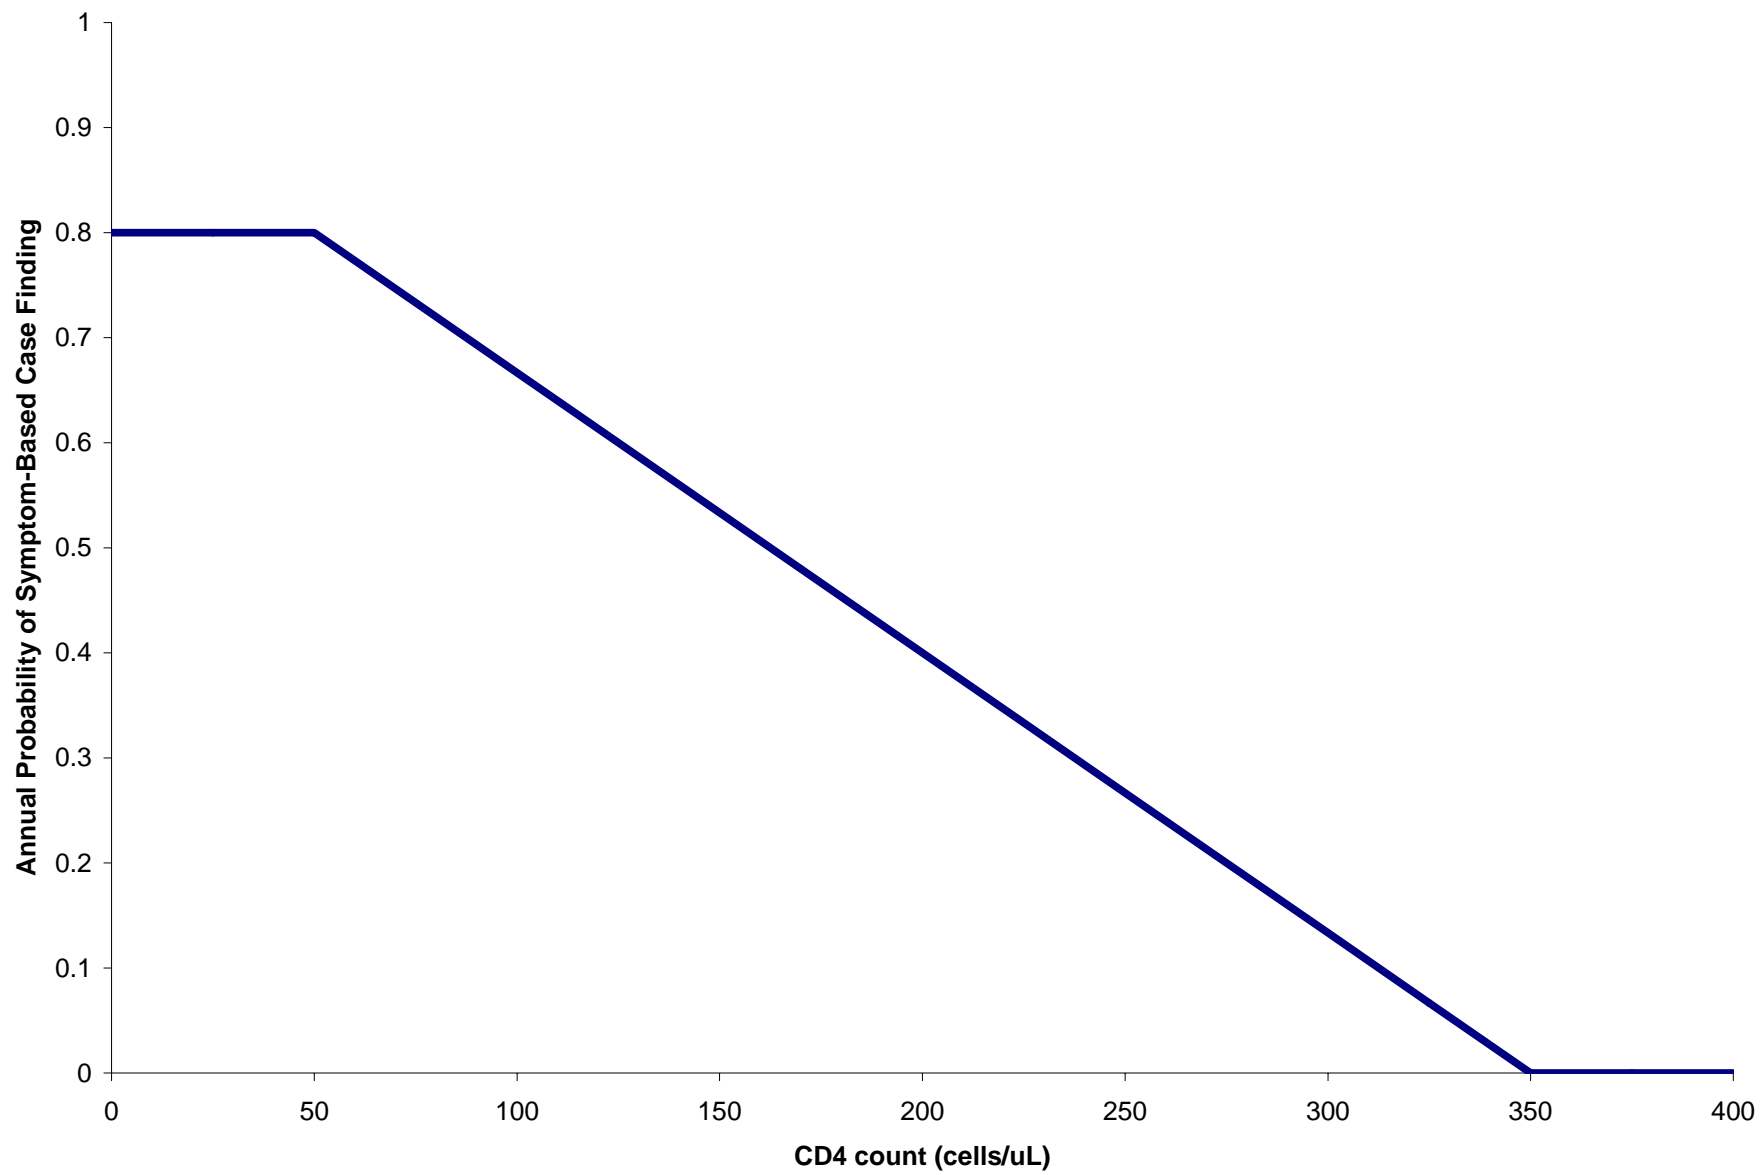

**Figure 4**
